# Supplementary material for: DksA Controls the Response of the Lyme Disease Spirochete Borrelia burgdorferi to Starvation
Source: PubMed Central journal article supplement (PMC6351744; doi:10.1128/jb.00582-18), 2019-01-28
Supplement: 1c5fbe8dfa9d679e6dfea008908777ef_JB.00582-18-s0001.pdf [file 1c5fbe8dfa9d679e6dfea008908777ef_JB.00582-18-s0001.pdf]

## Supplementary Material

### Materials and methods

#### Genetic transformation

The *bb0168* mutant strain,  $\Delta dksA$ , was generated in the *B. burgdorferi* B31-A3 background by homologous recombination. Homologous regions flanking the *bb0168* ORF (accession no. NP\_212302.1) immediately upstream and downstream were amplified by PCR into DNA fragments. The upstream fragment was amplified using the TB-*bb0168*-F1-5' primer containing BamHI restriction site (ACTGCTGGATCCAGTTATGGACTTCAAGGCTG) and the TB-*bb0168*-F1-3' primer containing EcoRI restriction site (AACAGCTTTTTGCATGAATTCTCCCTATAAATTACA), creating a 495 bp fragment (F1). The downstream fragment was amplified using the TB-*bb0168*-F2-5' primer containing the ClaI restriction site (GAAAAAAGAACA AAAAATCGATACATCTTAAGTTAGTTA) and the TB-*bb0168*-F2 3' primer containing the XhoI restriction site (ACTGCTCTCGAGAACCAACATTTTAAAATGATTGG), creating a 499 bp fragment (F2). The homologous fragments were joined to a streptomycin resistance cassette, *aadA*, driven by *flgB* promoter. The F1 and F2 fragments were digested using EcoRI and ClaI restriction enzymes, respectively. The *aadA* expression cassette was amplified from pKFSS1 (Frank et al., 2003) using the primers *aadA*-5'-EcoRI (ACTGCTGAATTCTACCCGAGCTTCAAGGAA) and *aadA*-3'-ClaI (ACTGCTATCGATTATTTGCCGACTACCTTG), and then digested with both EcoRI and ClaI. Each DNA fragment was purified by PCR-purification kit (Thermo Fisher Scientific, Grand Island, NY, United States) and then ligated with T4 DNA ligase. The homologous recombination construct containing fragments F1, *flgBp-aadA*, and F2 was inserted into a pPCR-script plasmid with a subsequent round of restriction digestion with BamHI and XhoI, and ligation reaction. The resulting plasmid, pCm- $\Delta dksA$ -*aadA*, was electroporated into *B. burgdorferi* B31-A3 and *B. burgdorferi* were plated on pBSK with streptomycin for selection. PCR was used to assess the presence of the *dksA* gene, the *aadA* gene, and plasmid content in transformed *B. burgdorferi* (Blevins et al., 2008; Samuels et al., 2018).

A  $\Delta dksA$  strain was also generated in the *B. burgdorferi* 297 strain (Hughes et al., 1992) background by homologous recombination. The upstream fragment (F1) was amplified to include an engineered AscI site at the 3' end and produced a 982 bp product (AG-*bb0168*-F1-5' CAGCGTAAATAAGCAAGGAGAATATACAATAGGAGC and AG-*bb0168*-F1-3' GGCGCGCCGGCTTGTGAAAGAGAGATTGCTAGGGAG). The downstream fragment (F2) was amplified to include an engineered AscI site at the 5' end and produced a 1,079 bp product (AG-*bb0168*-F2-5' GGCGCGCCTCTTCAATAAACTCATGCTCAGAAACAGC and AG-*bb0168*-F2-3' GCGCGCGATGCTGCACTTATCAAGATAGATAACATTC). The F1 and F2 fragments were individually TA cloned into pGEM-T Easy (Promega Corp., Madison, WI, United States) and confirmed by sequencing. The F2 fragment was excised from pGEM-T Easy using BssHIII and ligated into the AscI-linearized F1 vector. A kanamycin cassette, *flgBp-aphI-T7t* (Groshong et al., 2012), was inserted between the F1 and F2 fragments via the engineered AscI site. The resulting mutagenesis construct (pJSB636A) was confirmed by sequencing and contains the kanamycin cassette in the forward orientation. pJSB636A was electroporated into *B. burgdorferi* 297 and plated with kanamycin for selection. Positive transformants were recovered and evaluated by PCR for kanamycin replacement of *bb0168* and for plasmid content (Blevins et al., 2008).

A *dksA trans* complementation vector, pDksA, was constructed in the pBSV2G (Elias et al., 2003) and pKFSS1 (Frank et al., 2003) backgrounds to restore the expression of DksA in the  $\Delta dksA$  strains. The genomic DNA fragment containing the *dksA* gene and its 600 bp upstream sequence was amplified by PCR using primers *dksA* KpnI F and *dksA* FLG XhoI R. The amplification product retains the predicted native transcriptional start site for *dksA* and introduces a C-terminal DYKDDDDK(FLAG) epitope tag. The *dksA* amplicon was inserted in the background plasmid by restriction digest with KpnI and XhoI and ligation with T4 DNA ligase. Expression of *dksA* RNA and translated protein was detected by RT-qPCR and western blot, respectively.

- Blevins, J.S., Hagman, K.E., and Norgard, M.V. (2008). Assessment of decorin-binding protein A to the infectivity of *Borrelia burgdorferi* in the murine models of needle and tick infection. *BMC Microbiol* 8, 82.
- Elias, A.F., Bono, J.L., Kupko, J.J., 3rd, Stewart, P.E., Krum, J.G., and Rosa, P.A. (2003). New antibiotic resistance cassettes suitable for genetic studies in *Borrelia burgdorferi*. *J Mol Microbiol Biotechnol* 6, 29-40.
- Elias, A.F., Stewart, P.E., Grimm, D., Caimano, M.J., Eggers, C.H., Tilly, K., Bono, J.L., Akins, D.R., Radolf, J.D., Schwan, T.G., and Rosa, P. (2002). Clonal polymorphism of *Borrelia burgdorferi* strain B31 MI: implications for mutagenesis in an infectious strain background. *Infect Immun* 70, 2139-2150.
- Frank, K.L., Bundle, S.F., Kresge, M.E., Eggers, C.H., and Samuels, D.S. (2003). *aadA* confers streptomycin resistance in *Borrelia burgdorferi*. *J Bacteriol* 185, 6723-6727.
- Groshong, A.M., Gibbons, N.E., Yang, X.F., and Blevins, J.S. (2012). Rrp2, a prokaryotic enhancer-like binding protein, is essential for viability of *Borrelia burgdorferi*. *J Bacteriol* 194, 3336-3342.
- Hughes, C.A., Kodner, C.B., and Johnson, R.C. (1992). DNA analysis of *Borrelia burgdorferi* NCH-1, the first northcentral U.S. human Lyme disease isolate. *J Clin Microbiol* 30, 698-703.
- Samuels, D.S., Drecktrah, D., and Hall, L.S. (2018). Genetic Transformation and Complementation. *Methods Mol Biol* 1690, 183-200.

|                                  |                                                               |                                                          |
|----------------------------------|---------------------------------------------------------------|----------------------------------------------------------|
| <i>Borrelia burgdorferi</i> B31  | MQKAVSEHEFIEEIKKFLSAEKREILDSIKSVENSKKEIINNDMYPKDVVDIAFDNMDGN  | 60                                                       |
| <i>Borrelia garinii</i> PBi      | MQKASSEHEFIEEIKKFLSAEKREILDSIKSVENSKKEIINNDMYPKDVVDIAFDNMDGN  | 60                                                       |
| <i>Borrelia afzelii</i> PKo      | MQKAGSEHEFIEEIKKFLSAEKKEILDSIKSVENSKKEIINNDMYPKDVVDIAFDNMDGN  | 60                                                       |
| <i>Borrelia recurrentis</i> A1   | MQKSNFEHEFVEKMQTLLELKKELNSIRSVEDSKREIINNDMHLKDIVDIAFDNMDGN    | 60                                                       |
| <i>Borrelia hermsii</i> DAH      | MQKSNFEHEFIEKMHNFLLLESKKEILNSIRSVEDSKREIINNDMHLKDIIDIAFDNMDGN | 60                                                       |
| <i>Borrelia turicatae</i> 91E135 | MQKSNFEHEFVEKMRNFLLESKKEILNSIRSVEDSKREIINNDMHLKDIIDIAFDNMDGN  | 60                                                       |
|                                  | ***: ****:*:..:* *:*:*:*:*:*:*:*:*:*:*:*:*:*:*:*:*:*:*:*:*:*  |                                                          |
| <i>Borrelia burgdorferi</i> B31  | NLEALGFVEKRKLNLIHQALYRISQNSYKCLACEREIARERLLAIPYAFLCISCQTKKE   | 120                                                      |
| <i>Borrelia garinii</i> PBi      | NLEALGFVEKRKLNLIHQALYRISQNSYKCLACEKEIARERLLAIPYAFLCISCQTKKE   | 120                                                      |
| <i>Borrelia afzelii</i> PKo      | NLEALGFVEKRKLNLIHQALYRISQNSYKCLACEKEIARERLLAIPYAFLCISCQTKKE   | 120                                                      |
| <i>Borrelia recurrentis</i> A1   | NLEALSSVEKKLNLIHQALYRISHNIYGHCLACDKDIAQERLEAIPYAFLCISCQTKKE   | 120                                                      |
| <i>Borrelia hermsii</i> DAH      | NLEALSSVEKKLHLIHQALYRISQNTYGNCLACDKNIARERLEAIPYAFLCISCQTKKE   | 120                                                      |
| <i>Borrelia turicatae</i> 91E135 | NLEALSSVEKKLHLIHQALYRISQNTYGNCLACDKSITRERLVAIPYAFLCISCQTKKE   | 120                                                      |
|                                  | ****. ***:*:*:*:*:*:*:*:*:*:* *:*:*:*:*:*:*:*:*:*:* *:*:*:*   |                                                          |
| <i>Borrelia burgdorferi</i> B31  | KKNKR-- 125                                                   | <i>Borrelia burgdorferi</i> B31 100.0% sequence identity |
| <i>Borrelia garinii</i> PBi      | KKSKR-- 125                                                   | <i>Borrelia garinii</i> PBi 97.6%                        |
| <i>Borrelia afzelii</i> PKo      | KKSKR-- 125                                                   | <i>Borrelia afzelii</i> PKo 96.8%                        |
| <i>Borrelia recurrentis</i> A1   | KKSRRSI 127                                                   | <i>Borrelia recurrentis</i> A1 73.6%                     |
| <i>Borrelia hermsii</i> DAH      | KKSRRSV 127                                                   | <i>Borrelia hermsii</i> DAH 75.2%                        |
| <i>Borrelia turicatae</i> 91E135 | KKGKRSI 127                                                   | <i>Borrelia turicatae</i> 91E135 74.4%                   |
|                                  | **.:*                                                         |                                                          |

**Figure S1. Clustal Omega alignment indicates DksA amino acid sequence identity is high among *Borrelia*.** The ( \*) indicates an amino acid residue conserved in all species, ( :) indicates strong similarity, and ( . ) indicates weak similarity based on the PAM 250 matrix.

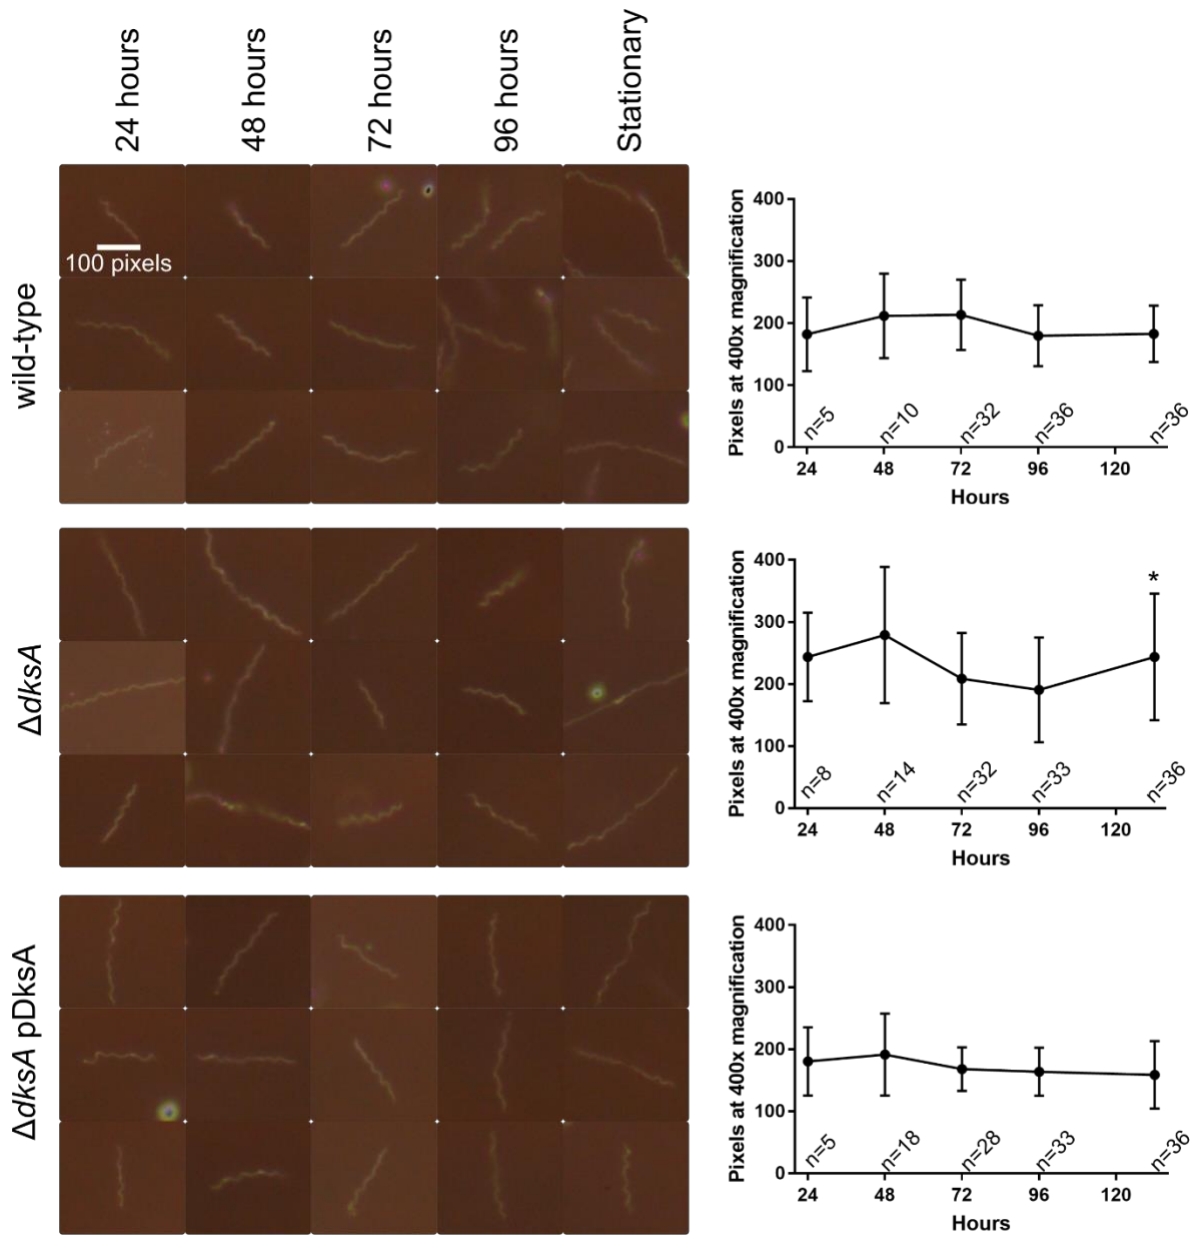

**Figure S2. Dark field microscopy of wild-type,  $\Delta dksA$ , and  $\Delta dksA$  pDksA strains.** *B. burgdorferi* cultures in BSK-II were passaged at a density of  $1 \times 10^5$  spirochetes  $\text{ml}^{-1}$ , then cultures were wet mounted for imaging every 24 h. At 24 h, 48 h, and at stationary phase, elongated forms of  $\Delta dksA$  strain are detectable. The relative lengths of spirochetes were determined by measuring pixel lengths in ImageJ. Error bars represent standard deviation. ANOVA with Tukey's post-hoc test was performed to compare the mean lengths of spirochetes between strains on each day. Asterisks represent statistical significance ( $p = 0.004$ ).

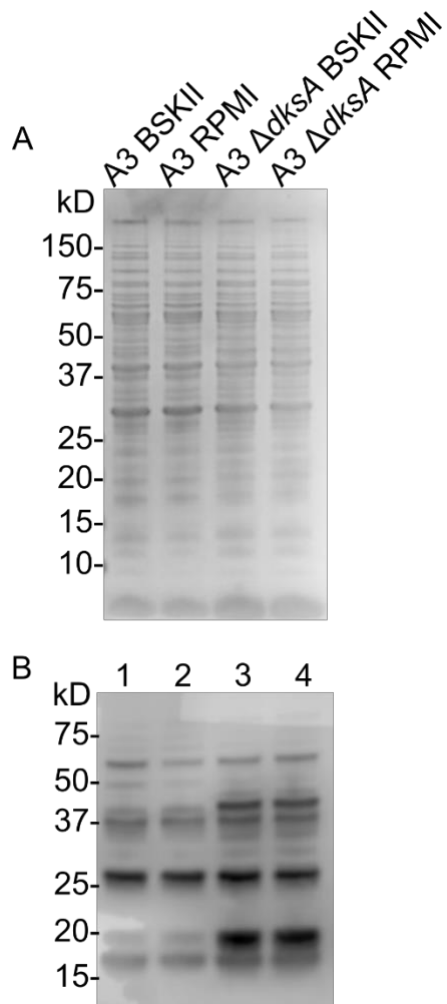

**Figure S3. Protein expression of wild-type and  $\Delta dksA$  spirochetes do not change significantly during starvation.** (A) SDS-PAGE gel of lysates harvested from spirochetes at logarithmic growth at  $5 \times 10^7$  spirochetes  $\text{ml}^{-1}$  in BSK-II and spirochetes following 6 h of starvation in RPMI. (B) A western blot was performed with protein lysates represented in (A) with serum from wild-type *B. burgdorferi*-infected mice. Lanes 1-4 in (B) correspond to respective lanes in (A).

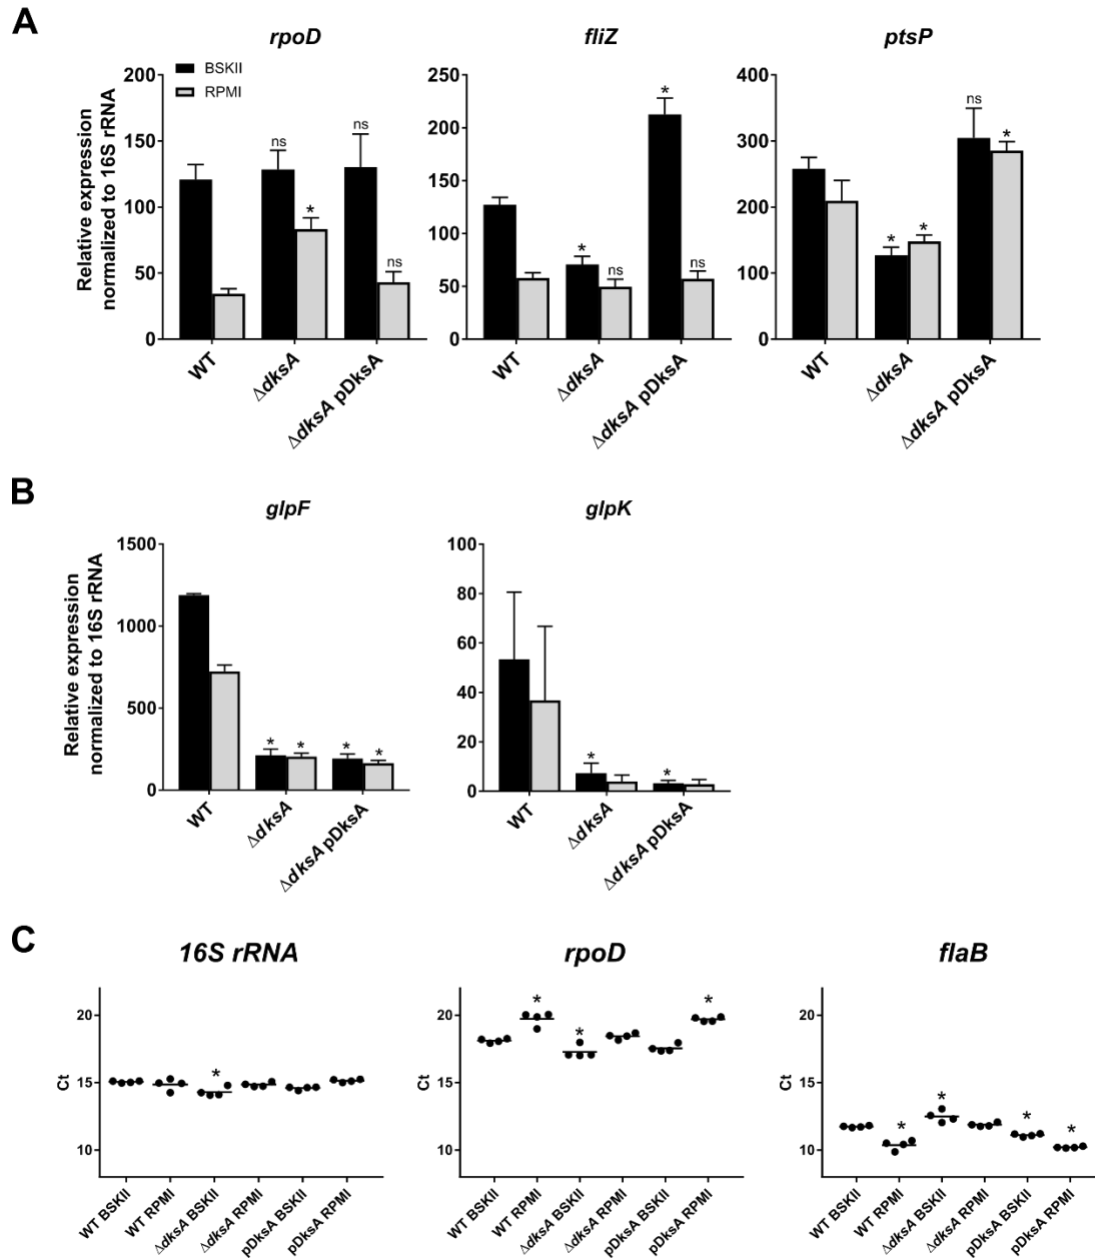

the *in trans* complementation did not rescue the expression of these genes. (C) Reference gene RNA expression in response to starvation. The Ct value for a RT-qPCR with a normalized 10 ng RNA equivalent input of cDNA and primer sets for three commonly utilized reference genes, 16S rRNA, *rpoD*, and *flaB* are shown. The Dunnett's multiple comparison test was performed between WT BSK-II RNA against all other samples. The asterisk indicates  $p$ -value  $< 0.01$  for Ct value. 16S rRNA provided least variable Ct values per ng RNA input.



**Table S1. Genes expressed higher by DksA-deficient *B. burgdorferi* during logarithmic growth.**

| ID      | Symbol | Description                                                      | Relative expression<br>$\Delta dksA$ /<br>WT | FDR<br>adjusted P-<br>value | Category      | $\Delta rel_{Bbu}$ /<br>WT<br>comparison<br>at<br>logarithmic<br>or stationary<br>phase<br>(Bugrysheva<br>, et al.) | $\Delta rel_{Bbu}$ /<br>WT<br>comparison<br>at<br>stationary<br>phase<br>(Drecktrah,<br>et al.) |
|---------|--------|------------------------------------------------------------------|----------------------------------------------|-----------------------------|---------------|---------------------------------------------------------------------------------------------------------------------|-------------------------------------------------------------------------------------------------|
| BB_L01  |        | phage portal protein                                             | 11.01                                        | 8.88E-09                    | Bacteriophage |                                                                                                                     |                                                                                                 |
| BB_A31  |        | pbsx family phage terminase                                      | 5.60                                         | 0.0015452                   | Bacteriophage | 2.94                                                                                                                |                                                                                                 |
| BB_N23  | blyA   | BlyA family holin                                                | 4.05                                         | 0.0224116                   | Bacteriophage | 3.09                                                                                                                |                                                                                                 |
| BB_A38  |        | phage portal protein                                             | 3.89                                         | 1.42E-07                    | Bacteriophage | 3.1                                                                                                                 | 7.31                                                                                            |
| BB_L23  | blyA   | BlyA family holin                                                | 3.64                                         | 0.0362139                   | Bacteriophage |                                                                                                                     |                                                                                                 |
| BB_L24  | blyB   | BlyB family holin                                                | 3.23                                         | 0.0001344                   | Bacteriophage |                                                                                                                     |                                                                                                 |
| BB_G21  |        | putative phage terminase large subunit                           | 2.95                                         | 0.0011066                   | Bacteriophage |                                                                                                                     |                                                                                                 |
| BB_H13  |        | RepU                                                             | 930.77                                       | 8.88E-09                    | Cell Division |                                                                                                                     |                                                                                                 |
| BB_H28  |        | PF-32 Protein                                                    | 34.37                                        | 1.29E-07                    | Cell Division |                                                                                                                     |                                                                                                 |
| BB_0301 | ftsQ   | cell division protein B                                          | 3.92                                         | 2.97E-07                    | Cell Division |                                                                                                                     |                                                                                                 |
| BB_H29  |        | Plasmid partitioning protein                                     | 3.91                                         | 0.0096163                   | Cell Division |                                                                                                                     |                                                                                                 |
| BB_0431 |        | CobQ/CobB/MinD/ParA nucleotide binding domain-containing protein | 3.47                                         | 8.57E-05                    | Cell Division |                                                                                                                     |                                                                                                 |
| BB_F24  |        | PF-32 Protein                                                    | 3.40                                         | 2.24E-06                    | Cell Division |                                                                                                                     |                                                                                                 |
| BB_0472 | murA   | UDP-N-acetylglucosamine 1-carboxyvinyltransferase                | 3.22                                         | 1.16E-07                    | Cell Division |                                                                                                                     |                                                                                                 |
| BB_G08  | Spo0J  | stage 0 sprulation protein                                       | 2.87                                         | 1.60E-05                    | Cell Division |                                                                                                                     |                                                                                                 |
| BB_0302 | ftsW   | cell division protein FtsW                                       | 2.74                                         | 0.0096729                   | Cell Division |                                                                                                                     | 7.78                                                                                            |
| BB_J18  |        | PF-32 Protein                                                    | 2.09                                         | 0.0492359                   | Cell Division |                                                                                                                     |                                                                                                 |
| BB_0300 | ftsA   | cell division protein FtsA                                       | 2.02                                         | 0.0001561                   | Cell Division | 4.03                                                                                                                |                                                                                                 |

|         |      |                                        |        |           |               |       |
|---------|------|----------------------------------------|--------|-----------|---------------|-------|
|         |      | complement regulator-acquiring surface |        |           |               |       |
| BB_H06  | cspZ | protein                                | 177.50 | 8.88E-09  | Cell Envelope |       |
| BB_H32  |      | P35 antigen                            | 86.69  | 6.30E-09  | Cell Envelope |       |
| BB_H37  |      | lipoprotein                            | 21.05  | 5.04E-07  | Cell Envelope |       |
| BB_A69  |      | putative surface protein               | 10.72  | 1.71E-08  | Cell Envelope |       |
| BB_A57  |      | P45-13                                 | 10.06  | 1.04E-05  | Cell Envelope |       |
| BB_0759 |      | membrane protein                       | 7.52   | 0.0100028 | Cell Envelope |       |
| BB_0117 |      | hemolysin III                          | 6.32   | 0.0012111 | Cell Envelope |       |
| BB_K50  |      | immunogenic protein P37                | 6.08   | 1.02E-06  | Cell Envelope |       |
| BB_0365 | la7  | lipoprotein LA7                        | 5.95   | 6.30E-09  | Cell Envelope |       |
| BB_0017 |      | integral membrane protein              | 5.10   | 0.0014213 | Cell Envelope |       |
| BB_0584 |      | integral membrane protein              | 4.69   | 2.53E-05  | Cell Envelope |       |
| BB_B27  |      | lipoprotien                            | 4.37   | 4.06E-06  | Cell Envelope |       |
| BB_J09  | ospD | outer surface protein D                | 4.12   | 1.10E-06  | Cell Envelope |       |
| BB_M37  | bppC | BppC Protein                           | 3.97   | 0.0377093 | Cell Envelope |       |
| BB_0016 | glpE | GlpE protein                           | 3.96   | 1.06E-07  | Cell Envelope |       |
|         |      | complement regulator-acquiring surface |        |           |               |       |
| BB_A68  | cspA | protein 1                              | 3.82   | 0.0001531 | Cell Envelope |       |
| BB_A03  |      | outer membrane protein                 | 3.59   | 1.15E-05  | Cell Envelope |       |
| BB_0473 |      | Integral membrane protein              | 3.56   | 1.34E-05  | Cell Envelope |       |
| BB_K07  |      | lipoprotein                            | 3.51   | 1.38E-05  | Cell Envelope |       |
| BB_J34  |      | lipoprotein                            | 3.49   | 0.0001068 | Cell Envelope |       |
| BB_0583 |      | integral membrane protein              | 2.78   | 1.40E-05  | Cell Envelope |       |
| BB_0628 |      | lipoprotein                            | 2.64   | 7.22E-05  | Cell Envelope |       |
| BB_0167 |      | outer membrane protein                 | 2.61   | 0.0143426 | Cell Envelope |       |
| BB_A52  |      | outer membrane protein                 | 2.52   | 0.0001037 | Cell Envelope |       |
| BB_R28  | mlpD | mlpD                                   | 2.50   | 0.0037356 | Cell Envelope |       |
| BB_S41  | erpG | ErpG protein                           | 2.43   | 9.02E-05  | Cell Envelope |       |
| BB_0383 | bmpA | basic membrane protein A               | 2.43   | 4.43E-06  | Cell Envelope |       |
| BB_0384 | bmpC | basic membrane protein C               | 2.19   | 0.0003251 | Cell Envelope |       |
| BB_0616 |      | Integral membrane protein              | 2.11   | 0.0099123 | Cell Envelope |       |
| BB_0158 |      | antigen, S2                            | 2.09   | 0.0011092 | Cell Envelope | 16.00 |
| BB_N38  | erpP | ErpP protein                           | 2.07   | 0.0007647 | Cell Envelope |       |

|         |        |                                                                        |       |           |                            |      |      |
|---------|--------|------------------------------------------------------------------------|-------|-----------|----------------------------|------|------|
| BB_0719 | mrdB   | rod shape-determining protein RodA                                     | 2.03  | 0.0004314 | Cell Envelope              |      |      |
| BB_0726 | ylxH-3 | flagellar biosynthesis protein FlhG                                    | 2.83  | 4.50E-05  | Chemotaxis and motility    | 3.87 | 3.05 |
| BB_0578 | mcp-1  | methyl-accepting chemotaxis protein                                    | 2.34  | 2.74E-06  | Chemotaxis and motility    |      | 8.34 |
| BB_0288 | fliI   | flagellum-specific ATP synthase FliI                                   | 2.25  | 0.0003979 | Chemotaxis and motility    |      |      |
| BB_0775 | flhO   | flagellar hook-basal body complex protein                              | 2.17  | 2.79E-05  | Chemotaxis and motility    |      | 2.04 |
| BB_0046 | rnhB   | ribonuclease HII                                                       | 10.75 | 0.0001379 | DNA replication and repair |      |      |
| BB_G32  |        | replicative DNA helicase                                               | 4.61  | 1.10E-06  | DNA replication and repair |      |      |
| BB_0461 |        | DNA polymerase III subunits gamma and tau                              | 4.05  | 2.06E-08  | DNA replication and repair |      |      |
| BB_0829 |        | exonuclease SbcD                                                       | 3.56  | 0.0234384 | DNA replication and repair |      |      |
| BB_0053 | ung    | uracil-DNA glycosylase                                                 | 3.52  | 0.0014391 | DNA replication and repair |      |      |
| BB_0552 | ligA   | NAD-dependent DNA ligase LigA                                          | 3.38  | 0.0068545 | DNA replication and repair |      | 6.23 |
| BB_0836 | uvrB   | excinuclease ABC, B subunit (uvrB)                                     | 2.63  | 0.000235  | DNA replication and repair |      | 5.10 |
| BB_0035 | parC   | DNA topoisomerase IV subunit A                                         | 2.57  | 0.0001746 | DNA replication and repair |      |      |
| BB_0623 | mfd    | transcription-repair coupling factor                                   | 2.07  | 0.0373433 | DNA replication and repair |      |      |
| BB_0036 | parE   | DNA topoisomerase IV subunit B                                         | 2.07  | 0.0003259 | DNA replication and repair |      |      |
| BB_0422 |        | 3-methyladenine DNA glycosylase                                        | 2.07  | 0.0001452 | DNA replication and repair |      |      |
| BB_H33  |        | adenine deaminase                                                      | 70.02 | 9.59E-06  | Metabolism                 |      |      |
| BB_0656 | hemN   | oxygen-independent coproporphyrinogen III oxidase                      | 9.86  | 5.91E-08  | Metabolism                 |      |      |
| BB_0760 | mazG   | gene 37 protein (Gp37)                                                 | 8.01  | 1.06E-07  | Metabolism                 |      |      |
| BB_0621 |        | 4-methyl-5(b-hydroxyethyl)-thiazole monophosphate biosynthesis protein | 7.70  | 3.87E-12  | Metabolism                 |      |      |
| BB_0015 | udk    | uridine kinase                                                         | 7.22  | 3.96E-09  | Metabolism                 |      | 4.53 |
| BB_A76  | thyX   | FAD-dependent thymidylate synthase                                     | 6.86  | 1.37E-08  | Metabolism                 |      |      |
| BB_0644 |        | N-acetylmannosamine-6-phosphate 2-epimerase                            | 6.12  | 3.13E-07  | Metabolism                 |      |      |
| BB_0605 |        | serine-type D-Ala-D-Ala carboxypeptidase                               | 6.04  | 3.43E-08  | Metabolism                 |      |      |
| BB_0618 | cdd    | cytidine deaminase                                                     | 5.60  | 0.0069376 | Metabolism                 |      |      |
| BB_0677 | mgIA   | ribose/galactose ABC transporter, ATP-binding protein (mgIA)           | 5.49  | 2.38E-07  | Metabolism                 |      | 5.74 |

|               |                                                       |       |           |                     |      |
|---------------|-------------------------------------------------------|-------|-----------|---------------------|------|
| BB_0408       | PTS system, fructose-specific IIBC component (fruA-1) | 5.16  | 1.02E-06  | Metabolism          |      |
| BB_0645 ptsG  | PTS system, glucose-specific IIBC component (ptsG)    | 4.84  | 3.82E-06  | Metabolism          |      |
| BB_0793 tmk   | thymidylate kinase                                    | 4.35  | 0.0004759 | Metabolism          |      |
| BB_0109       | acetyl-CoA C-acetyltransferase                        | 4.30  | 3.11E-08  | Metabolism          |      |
| BB_0515 trxB; | thioredoxin reductase                                 | 4.12  | 3.21E-08  | Metabolism          |      |
| BB_K17        | adenine deaminase                                     | 3.89  | 2.12E-05  | Metabolism          |      |
| BB_0636 zwf   | glucose-6-phosphate 1-dehydrogenase                   | 3.39  | 4.71E-07  | Metabolism          |      |
| BB_0679 mglC2 | ribose/galactose ABC transporter, permease protein    | 3.36  | 2.45E-08  | Metabolism          |      |
| BB_0407 manA  | mannose-6-phosphate isomerase                         | 3.30  | 1.57E-07  | Metabolism          |      |
| BB_0635 pncB  | nicotinate phosphoribosyltransferase                  | 3.23  | 0.0017069 | Metabolism          |      |
| BB_0421       | haloacid dehalogenase-like hydrolase                  | 3.08  | 2.78E-07  | Metabolism          | 4.59 |
| BB_0084       | cysteine desulfurase                                  | 3.07  | 0.0004776 | Metabolism          | 5.58 |
| BB_0625       | N-acetylmuramoyl-L-alanine amidase                    | 2.54  | 6.83E-08  | Metabolism          |      |
| BB_0364 mgsA  | methylglyoxal synthase                                | 2.53  | 0.0007647 | Metabolism          |      |
| BB_0037       | 1-acyl-sn-glycerol-3-phosphate acyltransferase        | 2.45  | 0.0003096 | Metabolism          |      |
| BB_0725       | serine-type D-Ala-D-Ala carboxypeptidase              | 2.43  | 0.0301233 | Metabolism          |      |
| BB_0601 glyA  | serine hydroxymethyltransferase                       | 2.39  | 2.71E-06  | Metabolism          |      |
| BB_0561 gnd   | 6-phosphogluconate dehydrogenase                      | 2.23  | 2.00E-06  | Metabolism          |      |
| BB_0303 mraY  | phospho-N-acetylmuramoyl-pentapeptide-transferase     | 2.14  | 7.65E-05  | Metabolism          |      |
| BB_0709       | aminodeoxychorismate lyase, putative                  | 2.09  | 0.0039143 | Metabolism          | 2.06 |
| BB_0761 nlpD  | peptidoglycan-binding protein                         | 9.82  | 5.59E-05  | Protein degradation |      |
| BB_0369 clpA  | ATP-dependent Clp protease, subunit A                 | 5.00  | 0.001243  | Protein degradation |      |
| BB_0757 clpP  | Clp protease                                          | 3.22  | 6.89E-08  | Protein degradation |      |
| BB_0185       | glycoprotease family protein                          | 2.41  | 0.0106663 | Protein degradation |      |
| BB_H18        | pseudogene                                            | 80.66 | 5.49E-07  | Pseudogene          |      |
| BB_L05        | pseudogene                                            | 13.78 | 6.29E-09  | Pseudogene          |      |

|         |                                                           |       |           |                              |      |      |
|---------|-----------------------------------------------------------|-------|-----------|------------------------------|------|------|
| BB_F13  | pseudogene                                                | 9.28  | 0.0030244 | Pseudogene                   |      |      |
| BB_J10  | pseudogene                                                | 7.74  | 1.93E-05  | Pseudogene                   |      |      |
| BB_J20  | pseudogene                                                | 7.59  | 0.031771  | Pseudogene                   |      |      |
| BB_A55  | pseudogene                                                | 7.31  | 8.53E-07  | Pseudogene                   |      |      |
| BB_F05  | pseudogene                                                | 7.16  | 0.0333887 | Pseudogene                   |      |      |
| BB_K02  | pseudogene                                                | 6.53  | 0.0013042 | Pseudogene                   |      |      |
| BB_F32  | pseudogene                                                | 6.19  | 3.96E-09  | Pseudogene                   | 3.09 |      |
| BB_A50  | pseudogene                                                | 5.75  | 0.0154108 | Pseudogene                   |      |      |
| BB_J15  | pseudogene                                                | 5.41  | 0.0007437 | Pseudogene                   |      |      |
| BB_A39  | pseudogene                                                | 5.32  | 0.0045571 | Pseudogene                   |      | 2.39 |
| BB_F22  | pseudogene                                                | 5.24  | 2.63E-06  | Pseudogene                   |      |      |
| BB_A14  | pseudogene                                                | 5.05  | 0.0069506 | Pseudogene                   |      | 7.36 |
| BB_F16  | pseudogene                                                | 4.33  | 0.0001763 | Pseudogene                   |      |      |
| BB_0845 | pseudogene                                                | 3.95  | 0.0014541 | Pseudogene                   |      |      |
| BB_A56  | pseudogene                                                | 3.42  | 2.44E-05  | Pseudogene                   |      |      |
| BB_A22  | pseudogene                                                | 3.18  | 0.0006357 | Pseudogene                   |      | 3.34 |
| BB_M22  | pseudogene                                                | 3.14  | 0.0007859 | Pseudogene                   |      |      |
| BB_G06  | pseudogene                                                | 2.27  | 1.05E-05  | Pseudogene                   |      |      |
| BB_0519 | grpE GrpE protein                                         | 3.88  | 8.08E-06  | Stress Response              |      |      |
| BB_0518 | dnaK molecular chaperone DnaK                             | 2.72  | 4.44E-07  | Stress Response              | 2.34 | 4.14 |
| BB_0264 | Hsp70 heat shock protein 70                               | 2.31  | 4.17E-05  | Stress Response              |      |      |
| BB_0517 | dnaJ chaperone protein DnaJ                               | 2.18  | 0.0015527 | Stress Response              | 2.84 |      |
| BB_D18  | hypothetical protein (rpoS repression)                    | 5.98  | 1.10E-06  | Transcription and regulation |      |      |
| BB_0781 | obg GTPase Obg                                            | 2.96  | 1.02E-08  | Transcription and regulation | 4.98 | 3.86 |
| BB_0693 | badR xylose operon regulatory protein                     | 2.35  | 2.88E-06  | Transcription and regulation |      |      |
| BB_0427 | rRNA small subunit methyltransferase I                    | 10.91 | 1.16E-07  | Translation                  |      |      |
| BB_0263 | lepB signal peptidase I                                   | 7.16  | 0.0001174 | Translation                  |      |      |
| BB_0590 | ksgA KsgA/Dim1 family 16S ribosomal RNA methyltransferase | 4.56  | 0.0099215 | Translation                  |      |      |
| BB_0135 | hisS histidyl-tRNA synthetase                             | 4.55  | 4.44E-07  | Translation                  |      |      |
| BB_0682 | trmU tRNA-specific 2-thiouridylase MnmA                   | 4.41  | 0.0023755 | Translation                  |      |      |
| BB_0214 | efp elongation factor P                                   | 4.22  | 3.38E-07  | Translation                  |      |      |
| BB_0788 | tilS tRNA(Ile)-lysine synthase                            | 3.91  | 0.0019798 | Translation                  |      | 2.25 |

|         |                                                                |        |           |                      |           |
|---------|----------------------------------------------------------------|--------|-----------|----------------------|-----------|
| BB_0734 | Sua5/YciO/YrdC/YwIC family protein                             | 3.19   | 0.0119751 | Translation          |           |
| BB_0787 | pth peptidyl-tRNA hydrolase                                    | 2.96   | 2.08E-06  | Translation          |           |
| BB_0143 | membrane protein insertion efficiency factor                   | 2.71   | 1.72E-05  | Translation          |           |
| BB_0169 | infA translation initiation factor IF-1                        | 2.65   | 0.0023389 | Translation          |           |
| BB_0483 | rplV 50S ribosomal protein L22                                 | 2.59   | 2.71E-06  | Translation          | 2.94      |
| BB_0780 | rpmA 50S ribosomal protein L27                                 | 2.55   | 0.0020275 | Translation          | 2.89 2.04 |
| BB_0659 | lysS lysyl-tRNA synthetase                                     | 2.41   | 0.000947  | Translation          |           |
| BB_0484 | rpsC 30S ribosomal protein S3                                  | 2.29   | 0.0001353 | Translation          | 2.78      |
| BB_0482 | rpsS 30S ribosomal protein S19                                 | 2.17   | 0.0001577 | Translation          | 2.51      |
| BB_0256 | rpsU 30S ribosomal protein S21                                 | 2.14   | 4.42E-05  | Translation          |           |
| BB_0660 | era GTPase Era                                                 | 2.11   | 0.0003595 | Translation          |           |
| BB_0481 | rplB 50S ribosomal protein L2                                  | 2.10   | 4.77E-06  | Translation          | 2.18      |
| BB_0186 | tsaE tRNA threonylcarbamoyladenosine biosynthesis protein      | 2.02   | 0.022608  | Translation          |           |
| BB_B23  | pbuG guanine/xanthine permease                                 | 6.92   | 3.16E-06  | Transporter Proteins | 7.94      |
| BB_A74  | oms28 outer membrane porin                                     | 5.83   | 2.07E-08  | Transporter Proteins |           |
| BB_0453 | small conductance mechanosensitive ion channel                 | 4.61   | 1.93E-05  | Transporter Proteins |           |
| BB_0641 | potH putrescine transport system permease protein PotH         | 4.58   | 0.0166154 | Transporter Proteins | 2.5       |
| BB_B05  | chbA chitobiose transporter protein                            | 4.42   | 0.0002703 | Transporter Proteins | 16.56     |
| BB_0216 | pstC phosphate ABC transporter permease                        | 4.25   | 0.0010279 | Transporter Proteins | 2.64      |
| BB_0724 | potassium transporter                                          | 4.16   | 1.00E-08  | Transporter Proteins | 2.69      |
| BB_0642 | potA spermidine/putrescine ABC transporter ATP-binding protein | 3.85   | 0.0020046 | Transporter Proteins | 53.08     |
| BB_0447 | Na <sup>+</sup> /H <sup>+</sup> antiporter (putative)          | 3.66   | 8.83E-07  | Transporter Proteins |           |
| BB_0452 | chromate transporter superfamily                               | 3.63   | 0.0195114 | Transporter Proteins |           |
| BB_0678 | mgIC1 sugar ABC transporter permease                           | 2.73   | 0.0003444 | Transporter Proteins |           |
| BB_B06  | chbB chitobiose transporter protein                            | 2.28   | 0.0190565 | Transporter Proteins | 32.45     |
| BB_0451 | chromate transport protein                                     | 2.17   | 0.0169344 | Transporter Proteins |           |
| BB_0448 | hpr phosphocarrier protein                                     | 2.04   | 0.0074269 | Transporter Proteins |           |
| BB_H26  | hypothetical protein                                           | 335.70 | 1.88E-07  | Unknown              |           |

|        |                      |       |           |         |  |            |
|--------|----------------------|-------|-----------|---------|--|------------|
| BB_H35 | hypothetical protein | 62.59 | 1.23E-06  | Unknown |  |            |
| BB_H31 | hypothetical protein | 49.83 | 4.24E-06  | Unknown |  |            |
| BB_F14 | hypothetical protein | 46.63 | 0.000176  | Unknown |  |            |
| BB_H25 | hypothetical protein | 26.80 | 1.17E-05  | Unknown |  |            |
| BB_L06 | hypothetical protein | 18.73 | 4.08E-05  | Unknown |  |            |
| BB_M08 | hypothetical protein | 18.02 | 0.0013665 | Unknown |  | 8.22       |
| BB_K30 | hypothetical protein | 17.99 | 0.0001353 | Unknown |  |            |
| BB_G15 | hypothetical protein | 16.51 | 4.21E-05  | Unknown |  | 3.42       |
| BB_L07 | hypothetical protein | 13.82 | 2.38E-07  | Unknown |  |            |
| BB_A23 | hypothetical protein | 13.35 | 6.85E-07  | Unknown |  | 2.43 3.05  |
| BB_L03 | hypothetical protein | 13.16 | 4.93E-06  | Unknown |  |            |
| BB_H19 | hypothetical protein | 12.80 | 0.0037313 | Unknown |  |            |
| BB_H18 | hypothetical protein | 12.20 | 0.0004197 | Unknown |  |            |
| BB_K11 | hypothetical protein | 11.84 | 0.0005807 | Unknown |  | 5.46       |
| BB_L04 | hypothetical protein | 11.28 | 2.37E-06  | Unknown |  |            |
| BB_D16 | hypothetical protein | 10.72 | 0.0019452 | Unknown |  |            |
| BB_O21 | hypothetical protein | 10.66 | 0.0009617 | Unknown |  | 3.93 10.41 |
| BB_M06 | hypothetical protein | 10.25 | 0.000275  | Unknown |  |            |
| BB_M03 | hypothetical protein | 9.45  | 0.0003782 | Unknown |  |            |
| BB_G24 | hypothetical protein | 9.36  | 3.04E-06  | Unknown |  |            |
| BB_N11 | hypothetical protein | 9.20  | 0.0035848 | Unknown |  |            |
| BB_L09 | hypothetical protein | 8.46  | 0.0001775 | Unknown |  |            |
| BB_M09 | hypothetical protein | 8.14  | 0.0009309 | Unknown |  |            |
| BB_H27 | hypothetical protein | 8.10  | 0.0039803 | Unknown |  |            |
| BB_M05 | hypothetical protein | 7.83  | 0.0006836 | Unknown |  |            |
| BB_G11 | hypothetical protein | 7.58  | 0.0096934 | Unknown |  |            |
| BB_J13 | hypothetical protein | 7.51  | 0.0002043 | Unknown |  |            |
| BB_F26 | hypothetical protein | 7.07  | 1.05E-05  | Unknown |  |            |
| BB_K31 | hypothetical protein | 6.92  | 0.0127393 | Unknown |  |            |
| BB_D12 | hypothetical protein | 6.66  | 2.74E-06  | Unknown |  |            |
| BB_F02 | hypothetical protein | 6.63  | 0.0394181 | Unknown |  |            |
| BB_G29 | hypothetical protein | 6.22  | 0.0001562 | Unknown |  |            |
| BB_K43 | hypothetical protein | 6.13  | 0.0054348 | Unknown |  |            |

|         |                      |      |           |         |            |
|---------|----------------------|------|-----------|---------|------------|
| BB_F08  | hypothetical protein | 5.96 | 0.0223915 | Unknown |            |
| BB_M07  | hypothetical protein | 5.80 | 7.73E-05  | Unknown |            |
| BB_A51  | hypothetical protein | 5.61 | 0.0027271 | Unknown | 5.6        |
| BB_B10  | hypothetical protein | 5.50 | 2.59E-05  | Unknown |            |
| BB_A40  | hypothetical protein | 5.43 | 3.11E-08  | Unknown | 5.23       |
| BB_K18  | hypothetical protein | 5.37 | 0.0018844 | Unknown |            |
| BB_R31  | hypothetical protein | 5.34 | 1.89E-06  | Unknown | 2.69       |
| BB_B24  | hypothetical protein | 5.29 | 4.78E-06  | Unknown |            |
| BB_A47  | hypothetical protein | 5.27 | 0.0122292 | Unknown | 4.65       |
| BB_J11  | hypothetical protein | 5.26 | 0.0001775 | Unknown |            |
| BB_G30  | hypothetical protein | 5.26 | 0.0009201 | Unknown |            |
| BB_F22  | hypothetical protein | 5.24 | 2.63E-06  | Unknown |            |
| BB_A48  | hypothetical protein | 5.21 | 0.0072997 | Unknown | 4.52       |
| BB_J37  | hypothetical protein | 5.08 | 0.0296013 | Unknown |            |
| BB_A46  | hypothetical protein | 4.93 | 0.000675  | Unknown | 4.55       |
| BB_K42  | hypothetical protein | 4.93 | 0.0099566 | Unknown |            |
| BB_L13  | hypothetical protein | 4.91 | 0.0009559 | Unknown |            |
| BB_A09  | hypothetical protein | 4.76 | 0.0015748 | Unknown | 2.05 34.78 |
| BB_L14  | hypothetical protein | 4.73 | 0.0113177 | Unknown |            |
| BB_A35  | hypothetical protein | 4.61 | 0.002625  | Unknown |            |
| BB_A10  | hypothetical protein | 4.53 | 0.000405  | Unknown | 2.24       |
| BB_A61  | hypothetical protein | 4.52 | 5.01E-06  | Unknown |            |
| BB_A30  | hypothetical protein | 4.46 | 1.29E-07  | Unknown |            |
| BB_A08  | hypothetical protein | 4.45 | 0.0116609 | Unknown |            |
| BB_L15  | hypothetical protein | 4.38 | 0.0062498 | Unknown |            |
| BB_B14  | hypothetical protein | 4.32 | 5.29E-05  | Unknown |            |
| BB_A11  | hypothetical protein | 4.26 | 0.0297429 | Unknown | 2.94 12.04 |
| BB_0162 | hypothetical protein | 4.26 | 3.81E-07  | Unknown |            |
| BB_G25  | hypothetical protein | 4.16 | 0.0188209 | Unknown |            |
| BB_K49  | hypothetical protein | 4.15 | 9.31E-06  | Unknown |            |
| BB_G20  | hypothetical protein | 4.14 | 0.0113876 | Unknown |            |
| BB_0206 | methyltransferase    | 4.05 | 5.49E-07  | Unknown |            |
| BB_G13  | hypothetical protein | 4.03 | 0.0189226 | Unknown |            |



|         |                      |      |           |         |      |      |
|---------|----------------------|------|-----------|---------|------|------|
| BB_O17  | hypothetical protein | 3.91 | 0.0016975 | Unknown |      |      |
| BB_G31  | hypothetical protein | 3.80 | 0.0014444 | Unknown |      |      |
| BB_S43  | hypothetical protein | 3.68 | 0.0333284 | Unknown |      |      |
| BB_B25  | hypothetical protein | 3.59 | 0.0008719 | Unknown |      |      |
| BB_H17  | hypothetical protein | 3.55 | 0.0042122 | Unknown |      |      |
| BB_O30  | hypothetical protein | 3.47 | 2.06E-08  | Unknown |      |      |
| BB_M10  | hypothetical protein | 3.34 | 0.0145176 | Unknown |      |      |
| BB_0050 | hypothetical protein | 3.30 | 0.0062498 | Unknown |      |      |
| BB_R29  | hypothetical protein | 3.26 | 0.0002024 | Unknown | 2.35 | 7.11 |
| BB_A41  | hypothetical protein | 3.26 | 1.85E-05  | Unknown | 4.53 |      |
| BB_0525 | hypothetical protein | 3.26 | 4.94E-06  | Unknown |      | 5.54 |
| BB_N02  | hypothetical protein | 3.21 | 0.0113876 | Unknown | 11.8 |      |
| BB_A13  | hypothetical protein | 3.21 | 0.0012265 | Unknown | 4.76 | 7.89 |
| BB_K05  | hypothetical protein | 3.14 | 0.0443233 | Unknown |      |      |
| BB_J38  | hypothetical protein | 3.06 | 0.0008719 | Unknown |      |      |
| BB_S44  | hypothetical protein | 3.05 | 0.0333887 | Unknown |      |      |
| BB_K47  | hypothetical protein | 3.03 | 1.72E-05  | Unknown |      |      |
| BB_A53  | Bbs27 protein        | 2.90 | 0.0012467 | Unknown | 2.33 |      |
| BB_0733 | hypothetical protein | 2.88 | 4.54E-05  | Unknown |      |      |
| BB_J19  | hypothetical protein | 2.86 | 3.97E-05  | Unknown |      |      |
| BB_A54  | hypothetical protein | 2.81 | 0.0008587 | Unknown |      |      |
| BB_0134 | hypothetical protein | 2.79 | 0.0443233 | Unknown |      |      |
| BB_O29  | hypothetical protein | 2.76 | 4.75E-05  | Unknown |      | 5.82 |
| BB_Q29  | hypothetical protein | 2.73 | 0.0001965 | Unknown |      |      |
| BB_G14  | hypothetical protein | 2.72 | 0.0373439 | Unknown |      |      |
| BB_L22  | hypothetical protein | 2.67 | 0.0003895 | Unknown |      |      |
| BB_0592 | hypothetical protein | 2.64 | 0.0004495 | Unknown |      |      |
| BB_N14  | hypothetical protein | 2.57 | 0.0066743 | Unknown |      |      |
| BB_B02  | hypothetical protein | 2.49 | 0.0030244 | Unknown |      | 3.76 |
| BB_M17  | hypothetical protein | 2.45 | 0.0461417 | Unknown |      |      |
| BB_0748 | hypothetical protein | 2.42 | 0.0166998 | Unknown |      | 8.82 |
| BB_F25  | hypothetical protein | 2.34 | 4.20E-06  | Unknown |      |      |
| BB_0207 | hypothetical protein | 2.22 | 0.0258281 | Unknown |      |      |

|         |                      |      |           |         |      |
|---------|----------------------|------|-----------|---------|------|
| BB_M30  | hypothetical protein | 2.20 | 0.0004818 | Unknown |      |
| BB_K23  | hypothetical protein | 2.20 | 0.0044889 | Unknown |      |
| BB_J48  | hypothetical protein | 2.19 | 0.0001117 | Unknown |      |
| BB_0165 | hypothetical protein | 2.15 | 2.11E-05  | Unknown |      |
| BB_G19  | hypothetical protein | 2.13 | 0.0033304 | Unknown |      |
| BB_0526 | hypothetical protein | 2.06 | 0.000514  | Unknown |      |
| BB_G33  | hypothetical protein | 2.03 | 0.0125006 | Unknown | 3.76 |
| BB_G18  | hypothetical protein | 2.00 | 0.0121709 | Unknown | 6.4  |

**Table S2. Gene expressed higher by wild-type *B. burgdorferi* during logarithmic growth.**

| ID      | Symbol | Description                  | Relative expression<br>$\Delta dksA$ /<br>WT | FDR<br>adjusted P-<br>value | Category      | $\Delta rel_{Bbu}$ /<br>WT<br>comparison<br>at<br>logarithmic<br>or stationary<br>phase<br>(Bugrysheva<br>, et al.) | $\Delta rel_{Bbu}$ /<br>WT<br>comparison<br>at<br>stationary<br>phase<br>(Drecktrah,<br>et al.) |
|---------|--------|------------------------------|----------------------------------------------|-----------------------------|---------------|---------------------------------------------------------------------------------------------------------------------|-------------------------------------------------------------------------------------------------|
| BB_Q40  |        | PF-32 Protein                | -19.94                                       | 4.08E-05                    | Cell Division |                                                                                                                     |                                                                                                 |
| BB_O33  |        | Plasmid partitioning protein | -2.95                                        | 0.0297429                   | Cell Division | -2.23                                                                                                               | -9.32                                                                                           |
| BB_A20  |        | PF-32 Protein                | -2.89                                        | 0.0167075                   | Cell Division |                                                                                                                     | -4.26                                                                                           |
| BB_0785 |        | regulatory protein SpoVG     | -2.77                                        | 4.22E-06                    | Cell Division |                                                                                                                     |                                                                                                 |
| BB_0437 | dnaA   | protein                      | -2.18                                        | 0.0008586                   | Cell Division |                                                                                                                     |                                                                                                 |
| BB_P33  |        | PF-32 Protein                | -2.02                                        | 0.0033179                   | Cell Division |                                                                                                                     |                                                                                                 |
| BB_A64  | p35    | antigen P35                  | -66.91                                       | 2.49E-07                    | Cell Envelope |                                                                                                                     |                                                                                                 |
| BB_Q06  |        | membrane protein             | -38.19                                       | 2.16E-06                    | Cell Envelope | -2.95                                                                                                               |                                                                                                 |
| BB_B19  | ospC   | outer surface protein C      | -21.98                                       | 2.82E-10                    | Cell Envelope |                                                                                                                     |                                                                                                 |
| BB_A65  |        | lipoprotein                  | -15.95                                       | 1.40E-05                    | Cell Envelope |                                                                                                                     |                                                                                                 |
| BB_Q03  |        | outer membrane protein       | -14.85                                       | 7.89E-05                    | Cell Envelope |                                                                                                                     |                                                                                                 |
| BB_A73  | P35    | antigen P35                  | -13.39                                       | 5.87E-08                    | Cell Envelope | -2.24                                                                                                               |                                                                                                 |
| BB_A07  | chpAI  | ChpAI protein                | -12.60                                       | 1.85E-07                    | Cell Envelope |                                                                                                                     |                                                                                                 |
| BB_A25  | dbpB   | decorin-binding protein B    | -12.47                                       | 3.07E-09                    | Cell Envelope |                                                                                                                     |                                                                                                 |
| BB_A24  | dbpA   | decorin-binding protein A    | -8.64                                        | 1.48E-06                    | Cell Envelope |                                                                                                                     |                                                                                                 |
| BB_Q05  | P35    | antigen P35                  | -6.35                                        | 0.0389522                   | Cell Envelope | -2.92                                                                                                               |                                                                                                 |
| BB_A66  |        | outersurface protein         | -5.78                                        | 0.0007865                   | Cell Envelope |                                                                                                                     |                                                                                                 |
| BB_Q35  | mlpJ   | multicopy lipoprotein J      | -5.36                                        | 0.0014814                   | Cell Envelope | -2.74                                                                                                               |                                                                                                 |
| BB_A05  | S1     | S1 Antigen                   | -4.95                                        | 0.012313                    | Cell Envelope |                                                                                                                     |                                                                                                 |
| BB_0250 |        | inner membrane protein       | -4.81                                        | 0.0126331                   | Cell Envelope |                                                                                                                     |                                                                                                 |
| BB_0071 |        | membrane protein             | -4.49                                        | 4.89E-05                    | Cell Envelope |                                                                                                                     |                                                                                                 |

|         |           |                                        |       |           |                            |       |       |
|---------|-----------|----------------------------------------|-------|-----------|----------------------------|-------|-------|
| BB_A15  | ospA      | outer surface protein A                | -4.31 | 1.50E-07  | Cell Envelope              | -2.07 | -3.51 |
| BB_A16  | ospB      | outer surface protein B                | -4.17 | 6.21E-07  | Cell Envelope              |       | -2.91 |
| BB_0385 | bmpD      | basic membrane protein D               | -4.11 | 5.19E-09  | Cell Envelope              |       | -7.62 |
| BB_M34  | bdrK      | BdrK protien                           | -3.11 | 0.0098305 | Cell Envelope              |       |       |
| BB_A36  |           | lipoprotein                            | -3.06 | 1.94E-06  | Cell Envelope              |       |       |
| BB_0674 |           | membrane protein                       | -3.05 | 0.0215104 | Cell Envelope              |       |       |
| BB_0603 | p66       | membrane-associated protein p66        | -2.98 | 2.85E-06  | Cell Envelope              |       |       |
| BB_0155 |           | lipoprotein                            | -2.95 | 0.001775  | Cell Envelope              |       |       |
| BB_Q42  | bdrV      | BdrV protien                           | -2.86 | 0.0001116 | Cell Envelope              |       |       |
| BB_O39  | erpL      | ErpL protein                           | -2.83 | 4.63E-06  | Cell Envelope              |       |       |
| BB_O40  | erpM      | ErMG protein                           | -2.60 | 6.13E-05  | Cell Envelope              | -2.2  |       |
| BB_L35  |           | BdrO protein                           | -2.58 | 1.40E-05  | Cell Envelope              |       |       |
| BB_F20  |           | lipoprotein                            | -2.53 | 0.0003296 | Cell Envelope              | -3.05 | -3.58 |
| BB_0795 | bamA      | outer membrane protein                 | -2.27 | 0.0001982 | Cell Envelope              |       |       |
| BB_M38  | erpK/ospF | ErpK/ospF protein                      | -2.14 | 0.0004823 | Cell Envelope              | -2.13 |       |
| BB_A62  | lp6.6     | lipoprotein                            | -2.11 | 0.0003259 | Cell Envelope              | -2.9  | -5.98 |
| BB_0353 |           | membrane protein                       | -2.05 | 0.001276  | Cell Envelope              |       |       |
| BB_0034 |           | outer membrane protein P13             | -2.03 | 0.0008068 | Cell Envelope              |       |       |
| BB_0744 | p83/100   | antigen, p83/100                       | -2.01 | 0.0001982 | Cell Envelope              |       |       |
| BB_0597 | mcp3      | methyl-accepting chemotaxis protein    | -3.89 | 2.09E-06  | Chemotaxis and motility    |       |       |
| BB_0183 | fliW      | flagellar assembly protein FliW        | -3.72 | 6.86E-05  | Chemotaxis and motility    | -2.61 |       |
| BB_0182 | flgL      | flagellar hook-associated protein      | -3.69 | 9.24E-07  | Chemotaxis and motility    |       |       |
| BB_0596 |           | methyl-accepting chemotaxis protein    | -3.58 | 0.0001068 | Chemotaxis and motility    |       |       |
| BB_0147 | flaB      | flagellar filament 41 kDa core protein | -2.58 | 0.0003264 | Chemotaxis and motility    |       | -2.48 |
| BB_0570 | cheY      | chemotaxis protein CheY                | -2.32 | 0.0001787 | Chemotaxis and motility    |       |       |
| BB_0681 | mcp-5     | methyl-accepting chemotaxis protein    | -2.13 | 0.0005452 | Chemotaxis and motility    | -3.74 |       |
| BB_0286 |           | flagellar protein                      | -2.06 | 0.0120597 | Chemotaxis and motility    |       |       |
| BB_0270 | flhF      | flagellar biosynthesis regulator FlhF  | -2.00 | 7.49E-05  | Chemotaxis and motility    |       |       |
| BB_Q67  |           | adenine specific DNA methyltransferase | -8.82 | 0.0145176 | DNA replication and repair | -2    |       |
| BB_0014 | priA      | primosomal protein N                   | -3.39 | 1.07E-05  | DNA replication and repair | -2.17 |       |
| BB_0438 | dnaN      | DNA polymerase III subunit beta        | -2.82 | 8.74E-06  | DNA replication and repair |       |       |

|         |                                             |        |           |                              |       |        |
|---------|---------------------------------------------|--------|-----------|------------------------------|-------|--------|
|         | single-stranded-DNA-specific                |        |           |                              |       |        |
| BB_0254 | recJ exonuclease                            | -2.63  | 0.0270294 | DNA replication and repair   |       |        |
| BB_0457 | uvrC excinuclease ABC subunit C             | -2.62  | 0.0307362 | DNA replication and repair   | -2.13 |        |
| BB_0344 | uvrD DNA helicase                           | -2.53  | 0.0005163 | DNA replication and repair   |       |        |
| BB_0827 | hrpA ATP-dependent helicase                 | -2.36  | 0.0009091 | DNA replication and repair   |       |        |
| BB_0241 | glpK glycerol kinase                        | -23.09 | 2.11E-09  | Metabolism                   |       | -44.32 |
| BB_0243 | glpD glycerol-3-phosphate dehydrogenase     | -14.05 | 1.84E-07  | Metabolism                   |       | -13.83 |
| BB_0248 | pepF oligoendopeptidase F                   | -6.88  | 0.0024371 | Metabolism                   |       |        |
| BB_0348 | pyk pyruvate kinase                         | -5.06  | 9.44E-07  | Metabolism                   |       | -9.92  |
| BB_0588 | bgp MTA/SAH nucleosidase                    | -4.23  | 7.06E-07  | Metabolism                   |       |        |
| BB_0249 | phosphatidylcholine synthase                | -4.05  | 0.0090386 | Metabolism                   |       |        |
| BB_0238 | lnt apolipoprotein N-acyltransferase        | -3.90  | 3.46E-08  | Metabolism                   |       |        |
| BB_0152 | nagB glucosamine-6-phosphate deaminase      | -3.45  | 0.0023125 | Metabolism                   |       |        |
|         | acetoacetate metabolism regulatory          |        |           |                              |       |        |
| BB_0763 | atoC protein AtoC                           | -3.22  | 0.000286  | Metabolism                   |       |        |
| BB_0010 | acpS holo-acyl-carrier protein synthase     | -3.00  | 9.38E-05  | Metabolism                   | -2.93 | -4.17  |
|         | diphosphate--fructose-6-phosphate 1-        |        |           |                              |       |        |
| BB_0020 | pfp phosphotransferase                      | -2.97  | 4.30E-08  | Metabolism                   |       | -2.27  |
| BB_0819 | cytidylate kinase                           | -2.59  | 7.65E-06  | Metabolism                   |       |        |
| BB_0337 | eno enolase                                 | -2.40  | 3.33E-07  | Metabolism                   |       | -2.36  |
| BB_0086 | Mg chelatase-like protein                   | -2.21  | 0.0149923 | Metabolism                   |       |        |
| BB_0120 | uppS undecaprenyl pyrophosphate synthase    | -2.00  | 0.0019362 | Metabolism                   |       |        |
| BB_0536 | pqqL zinc protease                          | -6.01  | 4.44E-07  | Protein degradation          | -2.43 | -4.63  |
| BB_0627 | apeB/pep aminopeptidase                     | -5.12  | 0.0013199 | Protein degradation          |       |        |
| BB_0366 | yscI aminopeptidase I                       | -3.40  | 5.07E-06  | Protein degradation          |       | -4.53  |
| BB_0253 | lon ATP-dependent protease LA               | -2.86  | 3.11E-08  | Protein degradation          |       |        |
| BB_Q41  | pseudogene                                  | -78.88 | 8.06E-08  | Pseudogene                   |       |        |
| BB_A71  | pseudogene                                  | -17.72 | 0.0001105 | Pseudogene                   |       |        |
| BB_0560 | htpG chaperone protein HtpG                 | -3.84  | 5.65E-06  | Stress Response              |       |        |
| BB_0690 | napA neutrophil activating protein A (napA) | -3.32  | 2.45E-06  | Stress Response              | -3.02 |        |
| BB_0649 | groL chaperonin GroEL                       | -2.48  | 3.97E-06  | Stress Response              |       |        |
| BB_0168 | dksA dnaK suppressor                        | -88.12 | 4.68E-05  | Transcription and regulation |       |        |
| BB_0626 | rnmV ribonuclease M5                        | -10.48 | 7.61E-05  | Transcription and regulation |       |        |

|         |        |                                                          |       |           |                              |       |        |
|---------|--------|----------------------------------------------------------|-------|-----------|------------------------------|-------|--------|
| BB_0198 | rel    | guanosine-3',5'-bis(diphosphate) 3'-pyrophosphohydrolase | -7.46 | 0.0002795 | Transcription and regulation |       |        |
| BB_0502 | rpoA   | DNA-directed RNA polymerase subunit alpha                | -3.52 | 3.11E-08  | Transcription and regulation |       |        |
| BB_0820 | rpoZ   | DNA-directed RNA polymerase subunit omega                | -2.47 | 0.0003972 | Transcription and regulation |       |        |
| BB_0033 | smpB   | SsrA-binding protein                                     | -6.74 | 0.0025972 | Translation                  |       | -3.79  |
| BB_0012 | truA   | tRNA pseudouridine synthase A                            | -6.28 | 0.0022215 | Translation                  |       |        |
| BB_0594 | argS   | arginyl-tRNA synthetase                                  | -4.10 | 3.17E-07  | Translation                  |       |        |
| BB_0203 | hflK   | membrane protease subunit HflK                           | -3.79 | 0.0001094 | Translation                  |       | -2.89  |
| BB_0204 | hflC   | HflC protein                                             | -3.27 | 0.0001146 | Translation                  |       |        |
| BB_0346 |        | export chaperone                                         | -2.79 | 0.0011614 | Translation                  |       | -2.10  |
| BB_0112 | rplI   | 50S ribosomal protein L9                                 | -2.74 | 2.21E-06  | Translation                  |       |        |
| BB_0503 | rplQ   | 50S ribosomal protein L17                                | -2.58 | 1.26E-05  | Translation                  |       |        |
| BB_0122 | tsf    | elongation factor Ts                                     | -2.55 | 2.07E-08  | Translation                  |       |        |
| BB_0127 |        | 30S ribosomal protein S1                                 | -2.51 | 3.26E-06  | Translation                  |       |        |
| BB_0653 | secF   | preprotein translocase subunit SecF                      | -2.50 | 3.90E-05  | Translation                  |       |        |
| BB_0501 | rpsK   | 30S ribosomal protein S11                                | -2.34 | 5.93E-05  | Translation                  |       |        |
| BB_0691 | fusA   | elongation factor G                                      | -2.29 | 7.06E-07  | Translation                  |       |        |
| BB_0088 | lepA   | elongation factor EF-4                                   | -2.21 | 4.52E-06  | Translation                  |       |        |
| BB_0123 | rpsB   | 30S ribosomal protein S2                                 | -2.17 | 3.18E-06  | Translation                  |       |        |
| BB_0101 | asnS   | asparaginyl-tRNA synthetase                              | -2.11 | 1.06E-05  | Translation                  |       |        |
| BB_0121 | frr    | ribosome recycling factor                                | -2.11 | 0.0005268 | Translation                  |       |        |
| BB_0358 |        | 16S ribosomal RNA methyltransferase                      | -2.06 | 0.0003545 | Translation                  |       |        |
| BB_0695 | rpsP   | 30S ribosomal protein S16                                | -2.05 | 1.89E-05  | Translation                  |       |        |
| BB_0240 | glpF   | glycerol uptake facilitator                              | -9.02 | 6.31E-10  | Transporter Proteins         | -2.05 | -27.10 |
| BB_0401 |        | glutamate transporter                                    | -8.13 | 2.35E-06  | Transporter Proteins         | -2.63 |        |
| BB_0329 | oppA-2 | oligopeptide permease peptide binding protein            | -7.41 | 2.07E-08  | Transporter Proteins         | -2.31 | -2.51  |
| BB_0454 |        | lipopolysaccharide biosynthesis-like protein             | -5.09 | 1.33E-08  | Transporter Proteins         |       |        |
| BB_0328 | oppA-1 | oligopeptide permease peptide binding protein            | -4.96 | 3.07E-09  | Transporter Proteins         | -2.29 | -6.28  |

|         |                                                           |        |           |                      |             |
|---------|-----------------------------------------------------------|--------|-----------|----------------------|-------------|
| BB_0144 | glycine/betaine ABC transporter substrate-binding protein | -2.52  | 9.23E-05  | Transporter Proteins |             |
| BB_0559 | ccr PTS system glucose-specific transporter               | -2.21  | 2.71E-06  | Transporter Proteins |             |
| BB_0318 | methylgalactoside ABC transporter ATP-binding protein     | -2.00  | 0.0010265 | Transporter Proteins |             |
| BB_B22  | pbuG1 guanine/xanthine permease                           | -2.00  | 0.0001901 | Transporter Proteins |             |
| BB_0242 | hypothetical protein                                      | -29.70 | 4.76E-06  | Unknown              | -2.64       |
| BB_Q49  | hypothetical protein                                      | -28.65 | 0.0003814 | Unknown              |             |
| BB_Q78  | hypothetical protein                                      | -22.38 | 0.000675  | Unknown              |             |
| BB_D24  | hypothetical protein                                      | -18.45 | 0.0001181 | Unknown              | -2.39       |
| BB_A72  | hypothetical protein                                      | -16.43 | 8.88E-09  | Unknown              |             |
| BB_A37  | hypothetical protein                                      | -9.19  | 0.0003814 | Unknown              | -4.18       |
| BB_J01  | hypothetical protein                                      | -8.16  | 0.0164636 | Unknown              |             |
| BB_0013 | hypothetical protein                                      | -6.91  | 0.0082159 | Unknown              | -3.58       |
| BB_A06  | hypothetical protein                                      | -6.71  | 0.0188698 | Unknown              |             |
| BB_0212 | hypothetical protein                                      | -6.54  | 0.0166631 | Unknown              | -2.94       |
| BB_0011 | hypothetical protein                                      | -5.78  | 0.0008974 | Unknown              |             |
| BB_0367 | hypothetical protein                                      | -5.65  | 0.0008218 | Unknown              | -3.97       |
| BB_0617 | hypothetical protein                                      | -5.20  | 0.0213989 | Unknown              | -2.33       |
| BB_0595 | hypothetical protein                                      | -4.90  | 0.0034075 | Unknown              |             |
| BB_0363 | hypothetical protein                                      | -4.85  | 0.0001982 | Unknown              | -2.11       |
| BB_0794 | hypothetical protein                                      | -4.24  | 4.72E-07  | Unknown              |             |
| BB_0024 | hypothetical protein                                      | -4.14  | 1.72E-05  | Unknown              | -2.58 -4.92 |
| BB_D13  | hypothetical protein                                      | -4.03  | 5.55E-08  | Unknown              | -3.78       |
| BB_0323 | hypothetical protein                                      | -3.80  | 5.38E-07  | Unknown              |             |
| BB_0261 | hypothetical protein                                      | -3.69  | 5.13E-06  | Unknown              |             |
| BB_0569 | hypothetical protein                                      | -3.63  | 1.13E-07  | Unknown              |             |
| BB_0397 | hypothetical protein                                      | -3.60  | 0.0166065 | Unknown              |             |
| BB_0110 | hypothetical protein                                      | -3.59  | 0.0156739 | Unknown              |             |
| BB_J23  | hypothetical protein                                      | -3.56  | 1.10E-06  | Unknown              | -2.07       |
| BB_0228 | hypothetical protein                                      | -3.54  | 0.0050987 | Unknown              |             |
| BB_0650 | hypothetical protein                                      | -3.50  | 3.66E-07  | Unknown              |             |

|         |                      |       |           |         |          |
|---------|----------------------|-------|-----------|---------|----------|
| BB_0028 | hypothetical protein | -3.49 | 7.16E-07  | Unknown |          |
| BB_0345 | hypothetical protein | -3.41 | 1.24E-06  | Unknown | -2.01    |
| BB_0614 | hypothetical protein | -3.18 | 7.41E-05  | Unknown |          |
| BB_0535 | hypothetical protein | -3.15 | 0.0083064 | Unknown |          |
| BB_0072 | hypothetical protein | -3.14 | 0.0006038 | Unknown |          |
| BB_0032 | hypothetical protein | -3.03 | 0.006664  | Unknown |          |
| BB_0019 | hypothetical protein | -2.99 | 0.001243  | Unknown |          |
| BB_0354 | hypothetical protein | -2.92 | 0.0007373 | Unknown |          |
| BB_0124 | hypothetical protein | -2.90 | 0.0003489 | Unknown |          |
| BB_0156 | hypothetical protein | -2.85 | 0.0134276 | Unknown |          |
| BB_0662 | hypothetical protein | -2.83 | 0.0004088 | Unknown |          |
| BB_0839 | hypothetical protein | -2.73 | 0.0140067 | Unknown |          |
| BB_0752 | hypothetical protein | -2.71 | 0.0011066 | Unknown |          |
| BB_0161 | hypothetical protein | -2.70 | 0.000104  | Unknown | -2.29    |
| BB_0661 | hypothetical protein | -2.62 | 0.0001132 | Unknown |          |
| BB_0139 | hypothetical protein | -2.60 | 2.53E-05  | Unknown | -3.34    |
| BB_0675 | hypothetical protein | -2.60 | 0.0322228 | Unknown |          |
| BB_0210 | hypothetical protein | -2.56 | 0.0388898 | Unknown |          |
| BB_0163 | hypothetical protein | -2.49 | 7.69E-06  | Unknown |          |
| BB_0564 | hypothetical protein | -2.45 | 0.0011932 | Unknown |          |
| BB_0731 | hypothetical protein | -2.42 | 0.0050987 | Unknown |          |
| BB_0696 | hypothetical protein | -2.38 | 4.40E-06  | Unknown |          |
| BB_0405 | hypothetical protein | -2.36 | 8.84E-06  | Unknown |          |
| BB_0418 | hypothetical protein | -2.33 | 0.0125928 | Unknown |          |
| BB_0648 | hypothetical protein | -2.32 | 0.0490717 | Unknown |          |
| BB_0322 | hypothetical protein | -2.31 | 1.64E-05  | Unknown |          |
| BB_0157 | hypothetical protein | -2.30 | 0.0011616 | Unknown |          |
| BB_0631 | hypothetical protein | -2.29 | 5.29E-05  | Unknown | -2 -4.11 |
| BB_0751 | hypothetical protein | -2.28 | 0.0002035 | Unknown | -2.22    |
| BB_0423 | hypothetical protein | -2.26 | 3.04E-06  | Unknown |          |
| BB_0192 | hypothetical protein | -2.25 | 0.0411471 | Unknown |          |
| BB_0252 | hypothetical protein | -2.21 | 0.0030244 | Unknown |          |
| BB_0663 | hypothetical protein | -2.21 | 0.0078689 | Unknown |          |



|         |                      |       |           |         |       |
|---------|----------------------|-------|-----------|---------|-------|
| BB_0126 | hypothetical protein | -2.18 | 0.0256829 | Unknown |       |
| BB_K40  | hypothetical protein | -2.13 | 1.34E-05  | Unknown |       |
| BB_0044 | hypothetical protein | -2.13 | 0.0085875 | Unknown | -2.71 |
| BB_0089 | hypothetical protein | -2.11 | 0.0026725 | Unknown |       |
| BB_0541 | hypothetical protein | -2.11 | 0.006215  | Unknown |       |
| BB_0818 | hypothetical protein | -2.10 | 0.0024371 | Unknown |       |
| BB_0459 | hypothetical protein | -2.09 | 0.0001289 | Unknown | -2.47 |
| BB_R34  | hypothetical protein | -2.08 | 0.0001068 | Unknown |       |
| BB_0359 | hypothetical protein | -2.08 | 7.89E-05  | Unknown | -1.96 |
| BB_0816 | hypothetical protein | -2.06 | 0.0013312 | Unknown |       |
| BB_0549 | hypothetical protein | -2.05 | 0.0440098 | Unknown |       |
| BB_0319 | hypothetical protein | -2.05 | 0.0074889 | Unknown |       |
| BB_0049 | hypothetical protein | -2.04 | 0.0227149 | Unknown | -2.36 |
| BB_0070 | hypothetical protein | -2.03 | 0.001834  | Unknown |       |

**Table S3. Genes differentially regulated by wild type in response to starvation condition.**

| ID      | Symbol      | Description                                                      | Relative expression RPMI / BSKII | FDR adjusted P-value | Category      | Relative expression $\Delta dksA$ / WT during logarithmic growth |
|---------|-------------|------------------------------------------------------------------|----------------------------------|----------------------|---------------|------------------------------------------------------------------|
| BB_L01  |             | phage portal protein                                             | 4.5                              | 1.00E-06             | Bacteriophage | 11.01                                                            |
| BB_L23  | <i>blyA</i> | BlyA family holin                                                | 8.08                             | 0.004621             | Bacteriophage | 3.64                                                             |
| BB_0443 |             | spoIIJ-associated protein                                        | -5.04                            | 0                    | Cell Division |                                                                  |
| BB_0817 | <i>murC</i> | UDP-N-acetylmuramate--L-alanine ligase                           | -4.27                            | 1.00E-06             | Cell Division |                                                                  |
| BB_B03  | <i>resT</i> | telomere resolvase                                               | -2.79                            | 9.60E-05             | Cell Division |                                                                  |
| BB_A20  |             | PF-32 Protein                                                    | -2.56                            | 0.045462             | Cell Division | -2.89                                                            |
| BB_0195 |             | cell division control protein 27                                 | 2.01                             | 0                    | Cell Division |                                                                  |
| BB_B12  |             | PF-32 Protein                                                    | 2.17                             | 0.023364             | Cell Division |                                                                  |
| BB_0715 |             | cell division protein FtsA                                       | 2.19                             | 4.30E-05             | Cell Division |                                                                  |
| BB_0598 | <i>murB</i> | UDP-N-acetylenolpyruvoylglucosamine reductase                    | 2.32                             | 0.016245             | Cell Division |                                                                  |
| BB_F24  |             | PF-32 Protein                                                    | 2.89                             | 1.00E-05             | Cell Division | 3.40                                                             |
| BB_J18  |             | PF-32 Protein                                                    | 3.2                              | 0.006731             | Cell Division | 2.09                                                             |
| BB_N32  |             | PF-32 Protein                                                    | 3.57                             | 0.008724             | Cell Division |                                                                  |
| BB_0431 |             | CobQ/CobB/MinD/ParA nucleotide binding domain-containing protein | 3.7                              | 9.60E-05             | Cell Division | 3.47                                                             |
| BB_F23  |             | PF-32 Protein                                                    | 3.77                             | 0.018732             | Cell Division |                                                                  |
| BB_J16  |             | Plasmid partitioning protein                                     | 3.92                             | 2.90E-05             | Cell Division |                                                                  |
| BB_M32  |             | PF-32 Protein                                                    | 4.39                             | 0.000265             | Cell Division |                                                                  |
| BB_K24  |             | PF-32 Protein                                                    | 5.62                             | 0                    | Cell Division |                                                                  |
| BB_B13  |             | Plasmid partitioning protein                                     | 7.3                              | 0.001141             | Cell Division |                                                                  |
| BB_Q07  |             | Plasmid partitioning protein                                     | 19.81                            | 0.00017              | Cell Division |                                                                  |
| BB_0574 |             | integral membrane protein                                        | -8.39                            | 0.000615             | Cell Envelope |                                                                  |
| BB_0193 |             | lipoprotein                                                      | -6.01                            | 0.012091             | Cell Envelope |                                                                  |
| BB_0234 |             | integral membrane protein                                        | -5.83                            | 9.00E-06             | Cell Envelope |                                                                  |

|         |             |                                                |       |          |               |       |
|---------|-------------|------------------------------------------------|-------|----------|---------------|-------|
| BB_0664 |             | lipoprotein                                    | -5.01 | 5.90E-05 | Cell Envelope |       |
| BB_0317 |             | Integral Membrane protein                      | -4.59 | 0.000681 | Cell Envelope |       |
| BB_0353 |             | membrane protein                               | -3.94 | 6.00E-06 | Cell Envelope | -2.05 |
| BB_0806 |             | lipoprotein                                    | -3.82 | 7.00E-06 | Cell Envelope |       |
| BB_0155 |             | lipoprotein                                    | -3.79 | 0.000196 | Cell Envelope | -2.95 |
| BB_0398 |             | lipoprotein                                    | -3.05 | 1.00E-05 | Cell Envelope |       |
| BB_K15  |             | antigen, P35                                   | -3.02 | 0.001636 | Cell Envelope |       |
| BB_F20  |             | lipoprotein                                    | -2.65 | 0.000421 | Cell Envelope | -2.53 |
| BB_S42  | <i>bapA</i> | BapA protein                                   | -2.56 | 0.002471 | Cell Envelope |       |
| BB_0108 |             | basic membrane protein                         | -2.42 | 0.005115 | Cell Envelope |       |
| BB_0172 |             | von Willebrand factor type A domain-containing | -2.42 | 0.002032 | Cell Envelope |       |
| BB_0071 |             | membrane protein                               | -2.01 | 0.007912 | Cell Envelope | -4.49 |
| BB_0473 |             | Integral membrane protein                      | 2.06  | 0.003515 | Cell Envelope | 3.56  |
| BB_0732 |             | penicillin-binding protein                     | 2.08  | 0.000224 | Cell Envelope |       |
| BB_J08  |             | surface protein                                | 2.17  | 2.00E-06 | Cell Envelope |       |
| BB_0719 | <i>mrdB</i> | rod shape-determining protein RodA             | 2.33  | 0.000166 | Cell Envelope | 2.03  |
| BB_K32  |             | fibronectin-binding protein                    | 2.55  | 1.40E-05 | Cell Envelope |       |
| BB_A52  |             | outer membrane protein                         | 2.6   | 0.000168 | Cell Envelope | 2.52  |
| BB_J34  |             | lipoprotein                                    | 2.61  | 0.001304 | Cell Envelope |       |
| BB_L40  | <i>erpO</i> | ErpO protein                                   | 2.77  | 2.00E-06 | Cell Envelope |       |
| BB_0167 |             | outer membrane protein                         | 2.78  | 0.045462 | Cell Envelope | 2.61  |
| BB_0603 | <i>p66</i>  | membrane-associated protein p66                | 2.83  | 5.00E-06 | Cell Envelope |       |
| BB_0136 |             | penicillin-binding protein                     | 2.85  | 0.004309 | Cell Envelope |       |
| BB_O28  | <i>mlpG</i> | mlpG lipoprotein                               | 2.89  | 2.90E-05 | Cell Envelope |       |
|         |             | complement regulator-acquiring surface protein |       |          |               |       |
| BB_A68  | <i>cspA</i> | 1                                              | 2.91  | 0.000959 | Cell Envelope | 3.82  |
| BB_N39  | <i>erpQ</i> | ErpQ protein                                   | 3.14  | 8.10E-05 | Cell Envelope |       |
| BB_K48  |             | immunogenic protein P37                        | 3.7   | 8.10E-05 | Cell Envelope |       |
| BB_K53  |             | outer membrane protein                         | 3.8   | 0        | Cell Envelope |       |
| BB_L39  | <i>erpN</i> | ErpN protein                                   | 3.89  | 1.30E-05 | Cell Envelope |       |
| BB_0584 |             | integral membrane protein                      | 4.03  | 0.000165 | Cell Envelope | 4.69  |
| BB_O40  | <i>erpM</i> | ErMG protein                                   | 4.41  | 1.00E-06 | Cell Envelope |       |
| BB_K01  |             | lipoprotein                                    | 4.69  | 4.00E-06 | Cell Envelope |       |

|         |                  |                                  |       |          |               |       |
|---------|------------------|----------------------------------|-------|----------|---------------|-------|
| BB_N28  | <i>mlpI</i>      | mlpI lipoprotein                 | 4.81  | 0.001156 | Cell Envelope |       |
| BB_0117 |                  | hemolysin III                    | 4.94  | 0.017783 | Cell Envelope | 6.32  |
| BB_A60  | <i>p27</i>       | surface lipoprotein P27          | 4.96  | 5.00E-06 | Cell Envelope |       |
| BB_S41  | <i>erpG</i>      | ErpG protein                     | 5.08  | 1.00E-06 | Cell Envelope | 2.43  |
| BB_R42  | <i>erpY</i>      | ErpY protein                     | 5.11  | 0.032463 | Cell Envelope |       |
| BB_Q06  |                  | membrane protein                 | 5.2   | 0.002945 | Cell Envelope |       |
| BB_K50  |                  | immunogenic protein P37          | 5.57  | 3.00E-06 | Cell Envelope | 6.08  |
| BB_J36  |                  | lipoprotein                      | 5.67  | 0        | Cell Envelope |       |
| BB_A36  |                  | lipoprotein                      | 5.73  | 0        | Cell Envelope |       |
| BB_0213 |                  | lipoprotein                      | 5.85  | 0.002526 | Cell Envelope |       |
| BB_0017 |                  | integral membrane protein        | 6.1   | 0.002095 | Cell Envelope | 5.10  |
| BB_0844 |                  | lipoprotein                      | 6.11  | 0        | Cell Envelope |       |
| BB_R28  | <i>mlpD</i>      | mlpD                             | 6.13  | 2.50E-05 | Cell Envelope | 2.50  |
| BB_K19  |                  | lipoprotein                      | 6.28  | 0        | Cell Envelope |       |
| BB_M27  | <i>revA</i>      | RevA fibronectin binding protein | 6.44  | 1.70E-05 | Cell Envelope |       |
| BB_Q03  |                  | outer membrane protein           | 6.58  | 0.001829 | Cell Envelope |       |
| BB_Q35  | <i>mlpJ</i>      | multicopy lipoprotein J          | 7.1   | 0.003706 | Cell Envelope |       |
| BB_A59  |                  | lipoprotein                      | 7.34  | 0        | Cell Envelope |       |
| BB_L28  | <i>mlpH</i>      | lipoprotein MlpH                 | 7.37  | 0        | Cell Envelope |       |
| BB_A04  | <i>S2</i>        | S2 Antigen                       | 7.44  | 7.20E-05 | Cell Envelope |       |
| BB_0383 | <i>bmpA</i>      | basic membrane protein A         | 8.17  | 0        | Cell Envelope | 2.43  |
| BB_0034 |                  | outer membrane protein P13       | 8.76  | 0        | Cell Envelope |       |
| BB_A69  |                  | putative surface protein         | 9.01  | 0        | Cell Envelope | 10.72 |
| BB_O39  | <i>erpL</i>      | ErpL protein                     | 9.4   | 0        | Cell Envelope |       |
| BB_S30  | <i>mlpE</i>      | mlpC                             | 9.8   | 3.00E-06 | Cell Envelope |       |
| BB_M38  | <i>erpK/ospI</i> | ErpK/ospF protein                | 9.83  | 0        | Cell Envelope |       |
| BB_H41  |                  | membrane protein                 | 10.25 | 0.000217 | Cell Envelope |       |
| BB_A03  |                  | outer membrane protein           | 11.17 | 0        | Cell Envelope | 3.59  |
| BB_P28  | <i>mlpA</i>      | surface lipoprotein              | 11.66 | 0        | Cell Envelope |       |
| BB_M28  | <i>mlpF</i>      | lipoprotein mlpF                 | 13.09 | 0        | Cell Envelope |       |
| BB_0365 | <i>la7</i>       | lipoprotein LA7                  | 13.9  | 0        | Cell Envelope | 5.95  |
| BB_A57  |                  | P45-13                           | 14.57 | 5.00E-06 | Cell Envelope | 10.06 |
| BB_K07  |                  | lipoprotein                      | 15.12 | 0        | Cell Envelope | 3.51  |

|         |             |                                              |        |          |                            |       |
|---------|-------------|----------------------------------------------|--------|----------|----------------------------|-------|
| BB_J09  | <i>ospD</i> | outer surface protein D                      | 33.88  | 0        | Cell Envelope              | 4.12  |
| BB_0286 |             | flagellar protein                            | -10.66 | 1.00E-06 | Chemotaxis and motility    | -2.06 |
| BB_0287 | <i>flbD</i> | flagellar protein FlbA                       | -5.9   | 0.001924 | Chemotaxis and motility    |       |
| BB_0274 | <i>fliQ</i> | flagellar biosynthesis protein FliQ          | -4.61  | 0.032696 | Chemotaxis and motility    |       |
| BB_0149 | <i>fliD</i> | flagellar hook-associated protein FliD       | -4.09  | 1.00E-06 | Chemotaxis and motility    |       |
| BB_0270 | <i>flhF</i> | flagellar biosynthesis regulator FlhF        | -3.96  | 0        | Chemotaxis and motility    | -2.00 |
| BB_0284 | <i>flgD</i> | flagellar hook capping protein               | -3.51  | 0.000289 | Chemotaxis and motility    |       |
| BB_0276 | <i>fliZ</i> | flagellar biosynthesis protein FliZ          | -3.47  | 0.001114 | Chemotaxis and motility    |       |
| BB_0289 | <i>fliH</i> | flagellar assembly protein H                 | -2.89  | 9.60E-05 | Chemotaxis and motility    |       |
| BB_0597 | <i>mcp3</i> | methyl-accepting chemotaxis protein          | -2.83  | 4.20E-05 | Chemotaxis and motility    | -3.89 |
| BB_0290 | <i>fliG</i> | flagellar motor switch protein G             | -2.69  | 2.00E-06 | Chemotaxis and motility    |       |
| BB_0550 | <i>fliS</i> | flagellar protein FliS                       | -2.46  | 0.022746 | Chemotaxis and motility    |       |
| BB_0282 | <i>flbD</i> | flagellar protein FlbD                       | -2.45  | 0.000143 | Chemotaxis and motility    |       |
| BB_0288 | <i>fliI</i> | flagellum-specific ATP synthase FliI         | -2.37  | 0.00039  | Chemotaxis and motility    |       |
| BB_0568 | <i>CheB</i> | chemotaxis protein CheB                      | -2.17  | 3.70E-05 | Chemotaxis and motility    |       |
| BB_0596 |             | methyl-accepting chemotaxis protein          | -2.13  | 0.004492 | Chemotaxis and motility    | -3.58 |
| BB_0279 | <i>fliL</i> | flagellar basal body-associated protein FliL | -2.06  | 0.001198 | Chemotaxis and motility    |       |
| BB_0271 | <i>flhA</i> | flagellar biosynthesis protein FlhA          | -2.05  | 0.001434 | Chemotaxis and motility    |       |
| BB_0147 | <i>flaB</i> | flagellar filament 41 kDa core protein       | 7.51   | 0        | Chemotaxis and motility    |       |
| BB_0438 | <i>dnaN</i> | DNA polymerase III subunit beta              | -5.18  | 0        | DNA replication and repair | -2.82 |
| BB_0457 | <i>uvrC</i> | excinuclease ABC subunit C                   | -3.86  | 0.006927 | DNA replication and repair | -2.62 |
| BB_0114 |             | single-stranded DNA-binding protein          | -3.53  | 1.00E-06 | DNA replication and repair |       |
| BB_0435 | <i>gyrA</i> | DNA gyrase subunit A                         | -3.43  | 0        | DNA replication and repair |       |
| BB_0111 | <i>dnaB</i> | replicative DNA helicase                     | -3.22  | 0.001459 | DNA replication and repair |       |
| BB_0254 | <i>recJ</i> | single-stranded-DNA-specific exonuclease     | -2.67  | 0.031751 | DNA replication and repair | -2.63 |
| BB_0534 | <i>xth</i>  | exodeoxyribonuclease III                     | -2.66  | 0.000115 | DNA replication and repair |       |
| BB_0232 | <i>hbb</i>  | HbbU protein                                 | -2.61  | 0.000114 | DNA replication and repair |       |
| BB_0436 | <i>gyrB</i> | DNA gyrase subunit B                         | -2.41  | 0.000439 | DNA replication and repair |       |
| BB_0297 |             | smf protein                                  | -2.3   | 9.70E-05 | DNA replication and repair |       |
| BB_0581 | <i>recG</i> | ATP-dependent DNA helicase RecG              | -2.18  | 0.010905 | DNA replication and repair |       |
| BB_0035 | <i>parC</i> | DNA topoisomerase IV subunit A               | 2.46   | 0.000522 | DNA replication and repair | 2.57  |
| BB_0836 | <i>uvrB</i> | excinuclease ABC, B subunit (uvrB)           | 2.82   | 0.000347 | DNA replication and repair | 2.63  |
| BB_0745 | <i>nth</i>  | endonuclease III                             | 2.85   | 0.03429  | DNA replication and repair |       |

|         |              |                                                                                      |        |          |                            |        |
|---------|--------------|--------------------------------------------------------------------------------------|--------|----------|----------------------------|--------|
| BB_0798 | <i>comF</i>  | competence protein F                                                                 | 2.87   | 0.000309 | DNA replication and repair |        |
| BB_G32  |              | replicative DNA helicase                                                             | 3      | 4.40E-05 | DNA replication and repair | 4.61   |
| BB_0014 | <i>priA</i>  | primosomal protein N                                                                 | 3.11   | 2.40E-05 | DNA replication and repair |        |
| BB_0633 | <i>recB</i>  | exodeoxyribonuclease V subunit beta                                                  | 4.56   | 1.00E-06 | DNA replication and repair |        |
| BB_0053 | <i>ung</i>   | uracil-DNA glycosylase                                                               | 7.58   | 8.00E-05 | DNA replication and repair | 3.52   |
| BB_0248 | <i>pepF</i>  | oligoendopeptidase F                                                                 | -12.07 | 0.000352 | Metabolism                 | -6.88  |
| BB_0243 | <i>glpD</i>  | glycerol-3-phosphate dehydrogenase                                                   | -4.8   | 3.50E-05 | Metabolism                 | -14.05 |
| BB_0791 |              | thymidine kinase                                                                     | -4.65  | 0        | Metabolism                 |        |
| BB_0683 | <i>hmgS</i>  | 3-hydroxy-3-methylglutaryl-CoA synthase                                              | -4.07  | 1.30E-05 | Metabolism                 |        |
| BB_0259 |              | transglycosylase SLT domain protein                                                  | -3.72  | 0.000161 | Metabolism                 |        |
|         |              | bifunctional phosphopantothenoylcysteine decarboxylase/phosphopantothenate--cysteine |        |          |                            |        |
| BB_0812 | <i>coaBC</i> | ligase                                                                               | -3.5   | 0.000219 | Metabolism                 |        |
| BB_0249 |              | phosphatidylcholine synthase                                                         | -3.43  | 0.009466 | Metabolism                 | -4.05  |
| BB_0120 | <i>uppS</i>  | undecaprenyl pyrophosphate synthase                                                  | -3.25  | 3.10E-05 | Metabolism                 | -2.00  |
| BB_0381 | <i>treA</i>  | trehalase                                                                            | -3.16  | 1.00E-05 | Metabolism                 |        |
| BB_0544 |              | phosphoribosylpyrophosphate synthetase                                               | -3.07  | 2.00E-06 | Metabolism                 |        |
| BB_0241 | <i>glpK</i>  | glycerol kinase                                                                      | -2.84  | 6.70E-05 | Metabolism                 | -23.09 |
| BB_0444 |              | nucleotide sugar epimerase                                                           | -2.82  | 4.00E-06 | Metabolism                 |        |
| BB_0709 |              | aminodeoxychorismate lyase, putative                                                 | -2.76  | 0.000331 | Metabolism                 |        |
| BB_0061 | <i>trx</i>   | thioredoxin                                                                          | -2.64  | 3.00E-06 | Metabolism                 |        |
|         |              | nicotinate (nicotinamide) nucleotide                                                 |        |          |                            |        |
| BB_0782 | <i>nadD</i>  | adenyltransferase                                                                    | -2.61  | 0.000179 | Metabolism                 |        |
| BB_0819 |              | cytidylate kinase                                                                    | -2.49  | 2.70E-05 | Metabolism                 | -2.59  |
| BB_0725 |              | serine-type D-Ala-D-Ala carboxypeptidase                                             | -2.43  | 0.010543 | Metabolism                 |        |
| BB_0467 |              | laccase domain containing protein                                                    | -2.4   | 0.015287 | Metabolism                 |        |
| BB_0575 | <i>pyrG</i>  | CTP synthetase                                                                       | -2.13  | 0.018686 | Metabolism                 |        |
| BB_0137 |              | long-chain-fatty-acid CoA ligase                                                     | 2.01   | 6.10E-05 | Metabolism                 |        |
| BB_0445 | <i>fbaA</i>  | fructose-bisphosphate aldolase                                                       | 2.1    | 7.40E-05 | Metabolism                 |        |
| BB_0463 | <i>ndk</i>   | nucleoside diphosphate kinase                                                        | 2.25   | 7.00E-06 | Metabolism                 |        |
|         |              | 4-methyl-5(b-hydroxyethyl)-thiazole                                                  |        |          |                            |        |
| BB_0621 |              | monophosphate biosynthesis protein                                                   | 2.35   | 0        | Metabolism                 | 7.70   |
| BB_0377 | <i>luxS</i>  | S-ribosylhomocysteinase                                                              | 2.36   | 0.002831 | Metabolism                 |        |

|         |               |                                                                 |      |          |            |      |
|---------|---------------|-----------------------------------------------------------------|------|----------|------------|------|
| BB_0630 | <i>pfkB</i>   | 1-phosphofructokinase                                           | 2.41 | 0.001102 | Metabolism |      |
| BB_A76  | <i>thyX</i>   | FAD-dependent thymidylate synthase                              | 2.49 | 4.60E-05 | Metabolism | 6.86 |
| BB_0588 | <i>bgp</i>    | MTA/SAH nucleosidase                                            | 2.51 | 0.000201 | Metabolism |      |
| BB_0084 |               | cysteine desulfurase                                            | 2.6  | 0.002428 | Metabolism | 3.07 |
| BB_0593 | <i>fadD</i>   | long-chain-fatty-acid CoA ligase                                | 2.65 | 0.000548 | Metabolism |      |
| BB_0561 | <i>gnd</i>    | 6-phosphogluconate dehydrogenase                                | 2.82 | 0        | Metabolism | 2.23 |
| BB_0622 | <i>ackA</i>   | acetate kinase                                                  | 2.83 | 0.000734 | Metabolism |      |
| BB_0004 | <i>pgm</i>    | phosphoglucomutase                                              | 2.9  | 0.027206 | Metabolism |      |
| BB_0601 | <i>glyA</i>   | serine hydroxymethyltransferase                                 | 3.08 | 1.00E-06 | Metabolism | 2.39 |
| BB_K17  |               | adenine deaminase                                               | 3.1  | 9.70E-05 | Metabolism | 3.89 |
| BB_0166 | <i>malQ</i>   | 4-alpha-glucanotransferase                                      | 3.11 | 5.00E-06 | Metabolism |      |
| BB_0768 |               | pyridoxal kinase                                                | 3.23 | 0.006772 | Metabolism |      |
| BB_0770 |               | divergent polysaccharide deacetylase<br>superfamily protein     | 3.24 | 1.00E-05 | Metabolism |      |
| BB_0677 | <i>mgIA</i>   | ribose/galactose ABC transporter, ATP-binding<br>protein (mgIA) | 3.32 | 1.40E-05 | Metabolism | 5.49 |
| BB_0629 | <i>fruA2</i>  | pts system, fructose-specific iiabc component                   | 3.59 | 1.00E-06 | Metabolism |      |
| BB_0524 |               | inositol monophosphatase                                        | 3.66 | 1.20E-05 | Metabolism |      |
| BB_0109 |               | acetyl-CoA C-acetyltransferase                                  | 3.87 | 0        | Metabolism | 4.30 |
| BB_0605 |               | serine-type D-Ala-D-Ala carboxypeptidase                        | 4.1  | 1.00E-06 | Metabolism | 6.04 |
| BB_0608 |               | aminoacyl-histidine dipeptidase                                 | 4.11 | 2.00E-06 | Metabolism |      |
| BB_0657 | <i>rpiA</i>   | ribose 5-phosphate isomerase                                    | 4.24 | 1.00E-06 | Metabolism |      |
| BB_0635 | <i>pncB</i>   | nicotinate phosphoribosyltransferase                            | 4.8  | 0.000377 | Metabolism | 3.23 |
| BB_0407 | <i>manA</i>   | mannose-6-phosphate isomerase                                   | 4.86 | 0        | Metabolism | 3.30 |
| BB_0057 | <i>gap</i>    | glyceraldehyde 3-phosphate dehydrogenase                        | 5.11 | 1.00E-06 | Metabolism |      |
| BB_0658 |               | phosphoglycerate mutase                                         | 5.47 | 0        | Metabolism |      |
| BB_0417 |               | adenylate kinase                                                | 5.67 | 0.000581 | Metabolism |      |
| BB_0337 | <i>eno</i>    | enolase                                                         | 5.68 | 0        | Metabolism |      |
| BB_0793 | <i>tmk</i>    | thymidylate kinase                                              | 5.8  | 0.000563 | Metabolism | 4.35 |
| BB_0644 |               | N-acetylmannosamine-6-phosphate 2-epimerase                     | 6.35 | 1.00E-06 | Metabolism | 6.12 |
| BB_0760 | <i>mazG</i>   | gene 37 protein (Gp37)                                          | 6.55 | 1.00E-06 | Metabolism | 8.01 |
| BB_0515 | <i>trxB</i> ; | thioredoxin reductase                                           | 7.04 | 0        | Metabolism | 4.12 |

|         |             |                                              |       |          |                     |        |
|---------|-------------|----------------------------------------------|-------|----------|---------------------|--------|
|         |             | PTS system, fructose-specific IIBC component |       |          |                     |        |
| BB_0408 |             | (fruA-1)                                     | 12.72 | 0        | Metabolism          | 5.16   |
| BB_0364 | <i>mgsA</i> | methylglyoxal synthase                       | 12.88 | 0        | Metabolism          | 2.53   |
| BB_0604 |             | L-lactate permease                           | 18.56 | 0        | Metabolism          |        |
|         |             | PTS system, glucose-specific IIBC component  |       |          |                     |        |
| BB_0645 | <i>ptsG</i> | (ptsG)                                       | 21.9  | 0        | Metabolism          | 4.84   |
|         |             | ATP-dependent protease ATP-binding subunit   |       |          |                     |        |
| BB_0612 | <i>clpX</i> | ClpX                                         | -3.91 | 0        | Protein degradation |        |
| BB_0253 | <i>lon</i>  | ATP-dependent protease LA                    | -3.14 | 0        | Protein degradation | -2.86  |
| BB_0536 | <i>pqqL</i> | zinc protease                                | -2.93 | 0.000117 | Protein degradation | -6.01  |
| BB_0246 |             | M23 peptidase domain-containing protein      | -2.49 | 0.000454 | Protein degradation |        |
| BB_0067 |             | peptidase                                    | -2.14 | 0        | Protein degradation |        |
| BB_0296 | <i>hslV</i> | ATP-dependent protease subunit HslV          | -2.02 | 0.046379 | Protein degradation |        |
| BB_0834 |             | ATP-dependent Clp protease subunit C         | 2.62  | 0.000852 | Protein degradation |        |
| BB_0757 | <i>clpP</i> | Clp protease                                 | 2.78  | 1.00E-06 | Protein degradation | 3.22   |
| BB_0761 | <i>nlpD</i> | peptidoglycan-binding protein                | 2.96  | 0.019335 | Protein degradation | 9.82   |
| BB_A71  |             | pseudogene                                   | -4.56 | 0.00257  | Pseudogene          | -17.72 |
| BB_F16  |             | pseudogene                                   | -4.21 | 0.000223 | Pseudogene          |        |
| BB_0522 |             | pseudogene                                   | -3.75 | 0.000249 | Pseudogene          |        |
| BB_0511 |             | pseudogene                                   | -3.73 | 0.000173 | Pseudogene          |        |
| BB_0140 |             | pseudogene                                   | -2.9  | 0.000143 | Pseudogene          |        |
| BB_0021 |             | queA                                         | -2.81 | 0.005675 | Pseudogene          |        |
| BB_B11  |             | pseudogene                                   | -2.81 | 0.03085  | Pseudogene          |        |
| BB_J10  |             | pseudogene                                   | 2.33  | 0.019959 | Pseudogene          | 7.74   |
| BB_A14  |             | pseudogene                                   | 3.39  | 0.031266 | Pseudogene          | 5.05   |
| BB_M22  |             | pseudogene                                   | 3.74  | 0.000283 | Pseudogene          | 3.14   |
| BB_0530 |             | pseudogene                                   | 3.78  | 0.00892  | Pseudogene          |        |
| BB_G06  |             | pseudogene                                   | 4.33  | 0        | Pseudogene          | 2.27   |
| BB_A55  |             | pseudogene                                   | 4.91  | 1.30E-05 | Pseudogene          | 7.31   |
| BB_A22  |             | pseudogene                                   | 7.51  | 5.00E-06 | Pseudogene          | 3.18   |
| BB_K39  |             | pseudogene                                   | 8.24  | 7.00E-06 | Pseudogene          |        |
| BB_F10  |             | pseudogene                                   | 9.57  | 0.01396  | Pseudogene          |        |
| BB_F22  |             | pseudogene                                   | 10.91 | 0        | Pseudogene          | 5.24   |



|         |              |                                                          |        |          |                              |       |
|---------|--------------|----------------------------------------------------------|--------|----------|------------------------------|-------|
| BB_Q01  |              | pseudogene                                               | 15.69  | 2.30E-05 | Pseudogene                   |       |
| BB_F32  |              | pseudogene                                               | 15.9   | 0        | Pseudogene                   | 6.19  |
| BB_Q57  |              | pseudogene                                               | 19.7   | 0        | Pseudogene                   |       |
| BB_0295 | <i>hslU</i>  | heat shock protein HslVU, ATPase subunit HslU            | -2.74  | 0.001674 | Stress Response              |       |
| BB_0519 | <i>grpE</i>  | GrpE protein                                             | 2.32   | 0.001171 | Stress Response              | 3.88  |
| BB_0518 | <i>dnaK</i>  | molecular chaperone DnaK                                 | 3.01   | 0        | Stress Response              | 2.72  |
| BB_0741 | <i>groS</i>  | chaperonin GroS                                          | 3.26   | 1.00E-05 | Stress Response              |       |
| BB_0517 | <i>dnaJ</i>  | chaperone protein DnaJ                                   | 5.14   | 2.00E-06 | Stress Response              | 2.18  |
| BB_0107 | <i>nusB</i>  | transcription antitermination factor NusB                | -7.59  | 0        | Transcription and regulation |       |
| BB_0060 |              | endoribonuclease                                         | -7.39  | 0        | Transcription and regulation |       |
| BB_0502 | <i>rpoA</i>  | DNA-directed RNA polymerase subunit alpha                | -6.17  | 0        | Transcription and regulation | -3.52 |
| BB_0712 | <i>rpoD</i>  | RNA polymerase sigma factor RpoD                         | -3.69  | 8.00E-06 | Transcription and regulation |       |
| BB_0198 | <i>rel</i>   | guanosine-3',5'-bis(diphosphate) 3'-pyrophosphohydrolase | -3.59  | 0.001886 | Transcription and regulation | -7.46 |
| BB_0132 | <i>greA</i>  | transcription elongation factor GreA                     | -3.49  | 1.00E-06 | Transcription and regulation |       |
| BB_0820 | <i>rpoZ</i>  | DNA-directed RNA polymerase subunit omega                | -3.48  | 2.10E-05 | Transcription and regulation | -2.47 |
| BB_0419 | <i>rrp-1</i> | response regulatory protein 1                            | -2.81  | 0.019055 | Transcription and regulation |       |
| BB_0504 |              | ribonuclease Y                                           | -2.71  | 6.60E-05 | Transcription and regulation |       |
| BB_0800 |              | transcription elongation factor NusA                     | -2.4   | 9.30E-05 | Transcription and regulation |       |
| BB_0388 | <i>rpoC</i>  | DNA-directed RNA polymerase subunit beta'                | -2.16  | 6.00E-06 | Transcription and regulation |       |
| BB_0693 | <i>badR</i>  | xylose operon regulatory protein                         | 2.32   | 1.20E-05 | Transcription and regulation | 2.35  |
| BB_0416 |              | pheromone shutdown protein                               | 2.63   | 0.000893 | Transcription and regulation |       |
| BB_0771 | <i>rpoS</i>  | RNA polymerase sigma factor                              | 3.73   | 5.10E-05 | Transcription and regulation |       |
| BB_D18  |              | hypothetical protein (rpoS repression)                   | 4.27   | 1.40E-05 | Transcription and regulation | 5.98  |
| BB_0168 | <i>dksA</i>  | dnaK suppressor                                          | 4.36   | 0.048919 | Transcription and regulation |       |
| BB_0184 | <i>csrA</i>  | carbon storage regulator                                 | 6.79   | 6.50E-05 | Transcription and regulation |       |
| BB_0803 | <i>truB</i>  | tRNA pseudouridine 55 synthase                           | -10.81 | 0        | Translation                  |       |
| BB_0005 | <i>trpS</i>  | tryptophanyl-tRNA synthetase                             | -7.47  | 2.00E-06 | Translation                  |       |
| BB_0122 | <i>tsf</i>   | elongation factor Ts                                     | -7.38  | 0        | Translation                  | -2.55 |
| BB_0031 | <i>lepB</i>  | signal peptidase I                                       | -4.77  | 4.00E-06 | Translation                  |       |
| BB_0088 | <i>lepA</i>  | elongation factor EF-4                                   | -4.24  | 0        | Translation                  | -2.21 |
| BB_0343 | <i>gatC</i>  | aspartyl/glutamyl-tRNA amidotransferase subunit C        | -4.24  | 0.000527 | Translation                  |       |

|         |             |                                                  |       |          |             |       |
|---------|-------------|--------------------------------------------------|-------|----------|-------------|-------|
| BB_0235 | <i>ychF</i> | GTP-binding protein YchF                         | -3.95 | 3.00E-06 | Translation |       |
| BB_0697 | <i>rimM</i> | 16S rRNA-processing protein RimM                 | -3.86 | 2.00E-06 | Translation |       |
| BB_0033 | <i>smpB</i> | SsrA-binding protein                             | -3.68 | 0.005293 | Translation | -6.74 |
| BB_0121 | <i>frr</i>  | ribosome recycling factor                        | -3.31 | 2.00E-05 | Translation | -2.11 |
| BB_0113 | <i>rpsR</i> | 30S ribosomal protein S18                        | -3.25 | 1.30E-05 | Translation |       |
| BB_0030 | <i>lepB</i> | signal peptidase I                               | -3.18 | 0.002411 | Translation |       |
| BB_0499 | <i>rpmJ</i> | 50S ribosomal protein L36                        | -3.17 | 0.000279 | Translation |       |
| BB_0123 | <i>rpsB</i> | 30S ribosomal protein S2                         | -3.08 | 0        | Translation | -2.17 |
| BB_0486 | <i>rpmC</i> | 50S ribosomal protein L29                        | -3.02 | 0.000303 | Translation |       |
| BB_0653 | <i>secF</i> | preprotein translocase subunit SecF              | -3.02 | 1.30E-05 | Translation | -2.50 |
| BB_0233 | <i>rpsT</i> | 30S ribosomal protein S20                        | -2.95 | 1.00E-06 | Translation |       |
| BB_0346 |             | export chaperone                                 | -2.92 | 0.000494 | Translation | -2.79 |
| BB_0115 |             | 30S ribosomal protein S6                         | -2.91 | 1.30E-05 | Translation |       |
| BB_0112 | <i>rplI</i> | 50S ribosomal protein L9                         | -2.8  | 3.00E-06 | Translation | -2.74 |
| BB_0610 | <i>tig</i>  | trigger factor                                   | -2.7  | 0.0021   | Translation |       |
| BB_0643 | <i>ylqF</i> | GTPase YlqF                                      | -2.65 | 0.010774 | Translation |       |
| BB_0204 | <i>hflC</i> | HflC protein                                     | -2.61 | 0.000438 | Translation | -3.27 |
| BB_0500 | <i>rpsM</i> | 30S ribosomal protein S13                        | -2.47 | 5.70E-05 | Translation |       |
| BB_0497 | <i>rplO</i> | 50S ribosomal protein L15                        | -2.45 | 3.50E-05 | Translation |       |
| BB_0489 | <i>rplX</i> | 50S ribosomal protein L24                        | -2.42 | 0.003357 | Translation |       |
| BB_0370 | <i>tyrS</i> | tyrosyl-tRNA synthetase                          | -2.35 | 0.000255 | Translation |       |
| BB_0695 | <i>rpsP</i> | 30S ribosomal protein S16                        | -2.33 | 3.00E-06 | Translation | -2.05 |
| BB_0064 | <i>fmt</i>  | methionyl-tRNA formyltransferase                 | -2.31 | 1.00E-06 | Translation |       |
| BB_0801 | <i>infB</i> | translation initiation factor IF-2               | -2.3  | 5.00E-06 | Translation |       |
| BB_0496 |             | 50S ribosomal protein L30                        | -2.26 | 7.10E-05 | Translation |       |
| BB_0508 | <i>engA</i> | GTP-binding protein Der                          | -2.26 | 0.002171 | Translation |       |
| BB_0492 | <i>rpsH</i> | 30S ribosomal protein S8                         | -2.21 | 1.40E-05 | Translation |       |
| BB_0786 |             | 50S ribosomal protein L25/general stress protein | -2.18 | 0.000629 | Translation |       |
| BB_0493 |             | 50S ribosomal protein L6                         | -2.17 | 0.000185 | Translation |       |
| BB_0127 |             | 30S ribosomal protein S1                         | -2.13 | 5.80E-05 | Translation | -2.51 |
| BB_0802 | <i>rbfA</i> | ribosome-binding factor A                        | -2.09 | 1.80E-05 | Translation |       |
| BB_0442 | <i>yidC</i> | membrane protein insertase YidC                  | -2.08 | 1.40E-05 | Translation |       |
| BB_0395 | <i>secE</i> | preprotein translocase subunit SecE              | -2.03 | 0.002575 | Translation |       |

|         |             |                                                 |       |          |                      |       |
|---------|-------------|-------------------------------------------------|-------|----------|----------------------|-------|
| BB_0229 | <i>rpmE</i> | 50S ribosomal protein L31                       | 2.04  | 0.000153 | Translation          |       |
| BB_0390 | <i>rplL</i> | 50S ribosomal protein L7/L12                    | 2.06  | 9.00E-06 | Translation          |       |
| BB_0427 |             | rRNA small subunit methyltransferase I          | 2.15  | 0.009449 | Translation          | 10.91 |
|         |             | ribosomal RNA large subunit methyltransferase   |       |          |                      |       |
| BB_0313 | <i>rrmJ</i> | J                                               | 2.24  | 0.000175 | Translation          |       |
| BB_0738 | <i>valS</i> | valyl-tRNA synthetase                           | 2.28  | 5.00E-06 | Translation          |       |
| BB_0251 | <i>leuS</i> | leucyl-tRNA synthetase                          | 2.34  | 0.005878 | Translation          |       |
| BB_0338 | <i>rpsI</i> | 30S ribosomal protein S9                        | 2.36  | 5.00E-05 | Translation          |       |
| BB_0769 | <i>tsaD</i> | UGMP family protein                             | 2.55  | 0.002727 | Translation          |       |
| BB_0446 | <i>aspS</i> | aspartyl-tRNA synthetase                        | 2.65  | 4.00E-06 | Translation          |       |
| BB_0833 | <i>ileS</i> | isoleucyl-tRNA synthetase                       | 2.68  | 0.009654 | Translation          |       |
| BB_0214 | <i>efp</i>  | elongation factor P                             | 2.83  | 1.30E-05 | Translation          | 4.22  |
| BB_0482 | <i>rpsS</i> | 30S ribosomal protein S19                       | 3.13  | 8.00E-06 | Translation          | 2.17  |
| BB_0135 | <i>hisS</i> | histidyl-tRNA synthetase                        | 3.78  | 4.00E-06 | Translation          | 4.55  |
| BB_0143 |             | membrane protein insertion efficiency factor    | 4.11  | 1.00E-06 | Translation          | 2.71  |
| BB_0256 | <i>rpsU</i> | 30S ribosomal protein S21                       | 4.16  | 0        | Translation          | 2.14  |
| BB_0196 | <i>prfA</i> | peptide chain release factor 1                  | 4.25  | 2.00E-06 | Translation          |       |
| BB_0660 | <i>era</i>  | GTPase Era                                      | 4.3   | 3.00E-06 | Translation          | 2.11  |
| BB_0263 | <i>lepB</i> | signal peptidase I                              | 4.31  | 0.003998 | Translation          | 7.16  |
| BB_0169 | <i>infA</i> | translation initiation factor IF-1              | 4.75  | 0.000117 | Translation          | 2.65  |
| BB_0476 | <i>tuf</i>  | elongation factor Tu                            | 5.01  | 1.40E-05 | Translation          |       |
| BB_0225 |             | tRNA-dihydrouridine synthase A                  | 8.78  | 0.006922 | Translation          |       |
| BB_0318 |             | methylgalactoside ABC transporter ATP-binding   | -3.68 | 6.00E-06 | Transporter Proteins | -2.00 |
| BB_0466 |             | ABC transporter ATP-binding protein             | -3.32 | 0        | Transporter Proteins |       |
| BB_0141 | <i>besA</i> | membrane fusion protein                         | -3.02 | 0.004492 | Transporter Proteins |       |
|         |             | glycine/betaine ABC transporter ATP-binding     |       |          |                      |       |
| BB_0146 |             | protein                                         | -2.9  | 4.00E-05 | Transporter Proteins |       |
| BB_0573 |             | ABC transporter ATP-binding protein             | -2.82 | 0.000439 | Transporter Proteins |       |
| BB_0042 | <i>phoU</i> | phosphate transport system regulatory protein   | -2.72 | 4.00E-05 | Transporter Proteins |       |
|         |             | hypothetical protein (lipopolysaccharide export |       |          |                      |       |
| BB_0808 |             | system permease protein)                        | -2.15 | 0.020888 | Transporter Proteins |       |
| BB_0742 |             | ABC transporter ATP-binding protein             | -2.13 | 0.000135 | Transporter Proteins |       |
| BB_J26  |             | ABC transporter, ATP-binding protein            | -2.1  | 0.010073 | Transporter Proteins |       |

|         |               |                                                       |        |          |                      |        |
|---------|---------------|-------------------------------------------------------|--------|----------|----------------------|--------|
| BB_0145 |               | glycine/betaine ABC transporter permease              | -2.05  | 0.002023 | Transporter Proteins |        |
| BB_0329 | <i>oppA-2</i> | oligopeptide permease peptide binding protein         | -2.05  | 0.00059  | Transporter Proteins | -7.41  |
| BB_B06  | <i>chbB</i>   | chitobiose transporter protein                        | -2.02  | 0.01931  | Transporter Proteins |        |
| BB_B29  | <i>malX2</i>  | PTS system transporter subunit IIBC                   | 2.22   | 0.002571 | Transporter Proteins |        |
| BB_0729 | <i>yhcL</i>   | dicarboxylate/amino acid:cation symporter             | 2.26   | 0.000321 | Transporter Proteins |        |
| BB_0559 | <i>ccr</i>    | PTS system glucose-specific transporter               | 2.42   | 2.00E-06 | Transporter Proteins |        |
| BB_0332 |               | peptide ABC transporter permease                      | 2.46   | 0        | Transporter Proteins |        |
| BB_0334 | <i>oppD</i>   | peptide ABC transporter ATP-binding protein           | 2.49   | 9.40E-05 | Transporter Proteins |        |
| BB_B05  | <i>chbA</i>   | chitobiose transporter protein                        | 2.79   | 0.01609  | Transporter Proteins | 4.42   |
| BB_B04  | <i>chcB</i>   | chitobiose transporter protein                        | 2.84   | 0.000128 | Transporter Proteins |        |
| BB_0447 |               | Na <sup>+</sup> /H <sup>+</sup> antiporter (putative) | 3.08   | 7.00E-06 | Transporter Proteins | 3.66   |
| BB_0218 | <i>pstB</i>   | phosphate ABC transporter ATP-binding protein         | 3.2    | 0.031751 | Transporter Proteins |        |
| BB_0638 |               | Na <sup>+</sup> /H <sup>+</sup> antiporter            | 3.72   | 0.001125 | Transporter Proteins |        |
| BB_0219 |               | metal cation transporter permease <i>gufA</i> protein | 3.74   | 2.00E-06 | Transporter Proteins |        |
| BB_0637 |               | Na <sup>+</sup> /H <sup>+</sup> antiporter family     | 4.02   | 5.00E-06 | Transporter Proteins |        |
| BB_A74  | <i>oms28</i>  | outer membrane porin                                  | 4.24   | 0        | Transporter Proteins | 5.83   |
| BB_B23  | <i>pbuG</i>   | guanine/xanthine permease                             | 5.44   | 3.00E-05 | Transporter Proteins | 6.92   |
| BB_0335 | <i>oppF</i>   | peptide ABC transporter ATP-binding protein           | 5.77   | 1.80E-05 | Transporter Proteins |        |
| BB_A34  | <i>oppA5</i>  | extracellular solute-binding protein, family 5        | 6.17   | 5.00E-06 | Transporter Proteins |        |
| BB_0453 |               | small conductance mechanosensitive ion channel        | 9.7    | 1.00E-06 | Transporter Proteins | 4.61   |
| BB_0242 |               | hypothetical protein                                  | -46.52 | 1.00E-06 | Unknown              | -29.70 |
| BB_0319 |               | hypothetical protein                                  | -14.34 | 0        | Unknown              | -2.05  |
| BB_0126 |               | hypothetical protein                                  | -11.07 | 1.40E-05 | Unknown              | -2.18  |
| BB_0011 |               | hypothetical protein                                  | -10.81 | 3.70E-05 | Unknown              | -5.78  |
| BB_0535 |               | hypothetical protein                                  | -7.3   | 0.000107 | Unknown              | -3.15  |
| BB_0298 |               | TPR domain protein                                    | -7.13  | 1.00E-06 | Unknown              |        |
| BB_0675 |               | hypothetical protein                                  | -6.84  | 0.000271 | Unknown              | -2.60  |
| BB_0439 |               | hypothetical protein                                  | -6.67  | 4.00E-06 | Unknown              |        |
| BB_0713 |               | hypothetical protein                                  | -6.5   | 0        | Unknown              |        |
| BB_0227 |               | hypothetical protein                                  | -6.26  | 0        | Unknown              |        |
| BB_0110 |               | hypothetical protein                                  | -6.18  | 0.000698 | Unknown              | -3.59  |
| BB_0397 |               | hypothetical protein                                  | -5.89  | 0.000631 | Unknown              | -3.60  |

|         |                                             |       |          |         |        |
|---------|---------------------------------------------|-------|----------|---------|--------|
| BB_0818 | hypothetical protein                        | -5.71 | 4.00E-06 | Unknown | -2.10  |
| BB_0792 | hypothetical protein                        | -5.58 | 1.00E-06 | Unknown |        |
| BB_0320 | hypothetical protein                        | -5.34 | 0.000165 | Unknown |        |
| BB_0266 | hypothetical protein                        | -4.98 | 2.00E-05 | Unknown |        |
| BB_0063 | hypothetical protein                        | -4.85 | 0        | Unknown |        |
| BB_0468 | hypothetical protein                        | -4.78 | 1.00E-06 | Unknown |        |
| BB_0794 | hypothetical protein                        | -4.63 | 0        | Unknown | -4.24  |
| BB_0336 | hypothetical protein                        | -4.57 | 4.50E-05 | Unknown |        |
| BB_0796 | hypothetical protein                        | -4.48 | 0.003828 | Unknown |        |
| BB_0322 | hypothetical protein                        | -4.23 | 0        | Unknown | -2.31  |
| BB_0661 | hypothetical protein                        | -4.13 | 3.00E-06 | Unknown | -2.62  |
| BB_0260 | hypothetical protein                        | -4.09 | 0.000999 | Unknown |        |
| BB_0058 | hypothetical protein                        | -4.07 | 1.00E-06 | Unknown |        |
| BB_0223 | hypothetical protein                        | -3.99 | 0.000969 | Unknown |        |
| BB_A72  | hypothetical protein                        | -3.97 | 1.30E-05 | Unknown | -16.43 |
| BB_0692 | hypothetical protein                        | -3.77 | 0.030077 | Unknown |        |
| BB_0356 | hypothetical protein                        | -3.74 | 0.003073 | Unknown |        |
| BB_0345 | hypothetical protein                        | -3.72 | 1.00E-06 | Unknown | -3.41  |
| BB_0707 | hypothetical protein                        | -3.72 | 0.001796 | Unknown |        |
| BB_0564 | hypothetical protein                        | -3.71 | 6.90E-05 | Unknown | -2.45  |
| BB_0700 | hypothetical protein                        | -3.71 | 0.002411 | Unknown |        |
| BB_0700 | hypothetical protein                        | -3.71 | 0.002411 | Unknown |        |
| BB_0059 | CBS domain-containing protein - hemolysin C | -3.65 | 1.00E-06 | Unknown |        |
| BB_0002 | hypothetical protein                        | -3.59 | 0.002427 | Unknown |        |
| BB_0619 | DHH family                                  | -3.47 | 1.80E-05 | Unknown |        |
| BB_0066 | hypothetical protein                        | -3.46 | 4.90E-05 | Unknown |        |
| BB_0192 | hypothetical protein                        | -3.43 | 0.001931 | Unknown | -2.25  |
| BB_0400 | hypothetical protein                        | -3.39 | 0.002701 | Unknown |        |
| BB_0701 | hypothetical protein                        | -3.29 | 0.002761 | Unknown |        |
| BB_0231 | hypothetical protein                        | -3.27 | 0        | Unknown |        |
| BB_0662 | hypothetical protein                        | -3.06 | 0.000265 | Unknown | -2.83  |
| BB_0363 | hypothetical protein                        | -3.05 | 0.003581 | Unknown | -4.85  |
| BB_0170 | hypothetical protein                        | -3.04 | 9.00E-06 | Unknown |        |

|         |                      |       |          |         |       |
|---------|----------------------|-------|----------|---------|-------|
| BB_0458 | hypothetical protein | -3.04 | 0        | Unknown |       |
| BB_0174 | hypothetical protein | -3.03 | 0.000853 | Unknown |       |
| BB_0403 | hypothetical protein | -2.99 | 3.00E-05 | Unknown |       |
| BB_0409 | hypothetical protein | -2.99 | 0.016415 | Unknown |       |
| BB_0554 | hypothetical protein | -2.98 | 2.00E-05 | Unknown |       |
| BB_0790 | hypothetical protein | -2.97 | 0.000234 | Unknown |       |
| BB_0019 | hypothetical protein | -2.9  | 0.002156 | Unknown | -2.99 |
| BB_0125 | hypothetical protein | -2.81 | 8.00E-06 | Unknown |       |
| BB_0418 | hypothetical protein | -2.77 | 0.003705 | Unknown | -2.33 |
| BB_0711 | hypothetical protein | -2.71 | 0.00013  | Unknown |       |
| BB_0044 | hypothetical protein | -2.7  | 0.002352 | Unknown | -2.13 |
| BB_0089 | hypothetical protein | -2.67 | 0.000479 | Unknown | -2.11 |
| BB_0156 | hypothetical protein | -2.67 | 0.005365 | Unknown | -2.85 |
| BB_0470 | hypothetical protein | -2.67 | 6.80E-05 | Unknown |       |
| BB_0569 | hypothetical protein | -2.62 | 3.00E-06 | Unknown | -3.63 |
| BB_0471 | hypothetical protein | -2.6  | 0.000265 | Unknown |       |
| BB_0538 | hypothetical protein | -2.58 | 0.000232 | Unknown |       |
| BB_0459 | hypothetical protein | -2.53 | 1.60E-05 | Unknown | -2.09 |
| BB_0708 | hypothetical protein | -2.51 | 0.015153 | Unknown |       |
| BB_0373 | hypothetical protein | -2.47 | 0.000962 | Unknown |       |
| BB_N14  | hypothetical protein | -2.43 | 0.010229 | Unknown |       |
| BB_0106 | TPR domain protein   | -2.37 | 3.10E-05 | Unknown |       |
| BB_0007 | hypothetical protein | -2.35 | 9.40E-05 | Unknown |       |
| BB_0307 | hypothetical protein | -2.32 | 0.00018  | Unknown |       |
| BB_0624 | hypothetical protein | -2.32 | 1.80E-05 | Unknown |       |
| BB_0663 | hypothetical protein | -2.3  | 0.005273 | Unknown | -2.21 |
| BB_0617 | hypothetical protein | -2.29 | 0.036744 | Unknown | -5.20 |
| BB_0043 | hypothetical protein | -2.23 | 3.10E-05 | Unknown |       |
| BB_0665 | hypothetical protein | -2.23 | 0.00095  | Unknown |       |
| BB_0648 | hypothetical protein | -2.2  | 0.017091 | Unknown | -2.32 |
| BB_0171 | hypothetical protein | -2.17 | 0.000534 | Unknown |       |
| BB_0163 | hypothetical protein | -2.14 | 9.70E-05 | Unknown | -2.49 |
| BB_0261 | hypothetical protein | -2.11 | 0.000999 | Unknown | -3.69 |

|         |                      |       |          |         |       |
|---------|----------------------|-------|----------|---------|-------|
| BB_0130 | hypothetical protein | -2.09 | 0.015602 | Unknown |       |
| BB_0268 | hypothetical protein | -2.08 | 0.00095  | Unknown |       |
| BB_0267 | hypothetical protein | -2.07 | 5.00E-05 | Unknown |       |
| BB_B28  | hypothetical protein | -2.07 | 0.004433 | Unknown |       |
| BB_0354 | hypothetical protein | -2.06 | 0.007237 | Unknown | -2.92 |
| BB_0070 | hypothetical protein | -2.03 | 0.003543 | Unknown | -2.03 |
| BB_0209 | hypothetical protein | -2.01 | 0.00024  | Unknown |       |
| BB_0159 | hypothetical protein | 2.01  | 0.030852 | Unknown |       |
| BB_A41  | hypothetical protein | 2.04  | 0.001775 | Unknown | 3.26  |
| BB_M19  | hypothetical protein | 2.05  | 0.000541 | Unknown |       |
| BB_0722 | hypothetical protein | 2.07  | 0.026144 | Unknown |       |
| BB_0539 | hypothetical protein | 2.08  | 6.80E-05 | Unknown |       |
| BB_P19  | hypothetical protein | 2.08  | 0.000379 | Unknown |       |
| BB_L19  | hypothetical protein | 2.12  | 0.000527 | Unknown |       |
| BB_0165 | hypothetical protein | 2.16  | 2.20E-05 | Unknown | 2.15  |
| BB_B26  | hypothetical protein | 2.17  | 0.036016 | Unknown |       |
| BB_J19  | hypothetical protein | 2.23  | 0.000301 | Unknown | 2.86  |
| BB_G09  | hypothetical protein | 2.29  | 0.002647 | Unknown |       |
| BB_0541 | hypothetical protein | 2.31  | 0.003154 | Unknown |       |
| BB_L22  | hypothetical protein | 2.34  | 0.001125 | Unknown | 2.67  |
| BB_A23  | hypothetical protein | 2.37  | 0.029657 | Unknown | 13.35 |
| BB_A13  | hypothetical protein | 2.4   | 0.009654 | Unknown | 3.21  |
| BB_J28  | hypothetical protein | 2.44  | 9.00E-06 | Unknown |       |
| BB_Q29  | hypothetical protein | 2.47  | 0.00047  | Unknown | 2.73  |
| BB_K40  | hypothetical protein | 2.54  | 3.00E-06 | Unknown |       |
| BB_0739 | hypothetical protein | 2.58  | 8.10E-05 | Unknown |       |
| BB_0428 | hypothetical protein | 2.6   | 4.10E-05 | Unknown |       |
| BB_0811 | hypothetical protein | 2.62  | 1.80E-05 | Unknown |       |
| BB_0510 | hypothetical protein | 2.65  | 0.000438 | Unknown |       |
| BB_0825 | hypothetical protein | 2.81  | 0.000234 | Unknown |       |
| BB_O29  | hypothetical protein | 2.81  | 4.90E-05 | Unknown | 2.76  |
| BB_0432 | hypothetical protein | 2.83  | 0.005391 | Unknown |       |
| BB_A09  | hypothetical protein | 2.84  | 0.029267 | Unknown | 4.76  |

|         |                      |      |          |         |       |
|---------|----------------------|------|----------|---------|-------|
| BB_M17  | hypothetical protein | 3.07 | 0.039143 | Unknown | 2.45  |
| BB_A40  | hypothetical protein | 3.09 | 4.00E-06 | Unknown | 5.43  |
| BB_0449 | hypothetical protein | 3.28 | 1.00E-06 | Unknown |       |
| BB_0208 | hypothetical protein | 3.43 | 0.029958 | Unknown |       |
| BB_M41  | hypothetical protein | 3.43 | 0.000187 | Unknown |       |
| BB_0206 | methyltransferase    | 3.46 | 3.00E-06 | Unknown | 4.05  |
| BB_G29  | hypothetical protein | 3.55 | 0.009908 | Unknown | 6.22  |
| BB_B10  | hypothetical protein | 3.56 | 0.000932 | Unknown | 5.50  |
| BB_G17  | hypothetical protein | 3.56 | 0.034712 | Unknown |       |
| BB_M30  | hypothetical protein | 3.56 | 1.40E-05 | Unknown | 2.20  |
| BB_D12  | hypothetical protein | 3.62 | 0.000156 | Unknown | 6.66  |
| BB_L04  | hypothetical protein | 3.62 | 0.001493 | Unknown | 11.28 |
| BB_0563 | hypothetical protein | 3.72 | 1.00E-06 | Unknown |       |
| BB_R44  | hypothetical protein | 3.77 | 0.004174 | Unknown |       |
| BB_K35  | hypothetical protein | 3.83 | 0.000455 | Unknown |       |
| BB_O43  | hypothetical protein | 3.86 | 0.047234 | Unknown |       |
| BB_0525 | hypothetical protein | 3.87 | 3.00E-06 | Unknown | 3.26  |
| BB_M03  | hypothetical protein | 3.94 | 0.027709 | Unknown | 9.45  |
| BB_0207 | hypothetical protein | 4.04 | 0.002233 | Unknown | 2.22  |
| BB_F26  | hypothetical protein | 4.23 | 0.00052  | Unknown | 7.07  |
| BB_O30  | hypothetical protein | 4.23 | 0        | Unknown | 3.47  |
| BB_K47  | hypothetical protein | 4.39 | 2.00E-06 | Unknown | 3.03  |
| BB_A54  | hypothetical protein | 4.4  | 4.90E-05 | Unknown | 2.81  |
| BB_J46  | hypothetical protein | 4.48 | 0.000427 | Unknown |       |
| BB_L12  | hypothetical protein | 4.48 | 0.009449 | Unknown |       |
| BB_0077 | hypothetical protein | 4.53 | 0.002565 | Unknown |       |
| BB_0324 | hypothetical protein | 4.61 | 2.50E-05 | Unknown |       |
| BB_0756 | hypothetical protein | 4.67 | 0.003285 | Unknown |       |
| BB_R31  | hypothetical protein | 4.85 | 7.00E-06 | Unknown | 5.34  |
| BB_L41  | hypothetical protein | 4.97 | 0.003423 | Unknown |       |
| BB_M07  | hypothetical protein | 4.98 | 0.000398 | Unknown | 5.80  |
| BB_R29  | hypothetical protein | 4.99 | 3.00E-05 | Unknown | 3.26  |
| BB_J48  | hypothetical protein | 5    | 0        | Unknown | 2.19  |



|         |                      |       |          |         |       |
|---------|----------------------|-------|----------|---------|-------|
| BB_N02  | hypothetical protein | 5.08  | 0.00311  | Unknown | 3.21  |
| BB_G19  | hypothetical protein | 5.11  | 4.00E-06 | Unknown | 2.13  |
| BB_0547 | hypothetical protein | 5.13  | 0.001003 | Unknown |       |
| BB_G31  | hypothetical protein | 5.35  | 7.00E-04 | Unknown | 3.80  |
| BB_0048 | hypothetical protein | 5.46  | 0.000358 | Unknown |       |
| BB_J31  | hypothetical protein | 5.52  | 5.00E-06 | Unknown |       |
| BB_L18  | hypothetical protein | 5.69  | 0.042986 | Unknown |       |
| BB_0740 | hypothetical protein | 5.71  | 1.00E-06 | Unknown |       |
| BB_0523 | hypothetical protein | 5.89  | 3.30E-05 | Unknown |       |
| BB_J11  | hypothetical protein | 6.21  | 0.000128 | Unknown | 5.26  |
| BB_0773 | hypothetical protein | 6.27  | 0.009977 | Unknown |       |
| BB_0762 | hypothetical protein | 6.31  | 1.20E-05 | Unknown |       |
| BB_Q78  | hypothetical protein | 6.33  | 0.015565 | Unknown |       |
| BB_B14  | hypothetical protein | 6.61  | 8.00E-06 | Unknown | 4.32  |
| BB_F25  | hypothetical protein | 6.68  | 0        | Unknown | 2.34  |
| BB_G18  | hypothetical protein | 6.88  | 2.10E-05 | Unknown | 2.00  |
| BB_D16  | hypothetical protein | 7.15  | 0.021134 | Unknown | 10.72 |
| BB_0631 | hypothetical protein | 7.9   | 0        | Unknown |       |
| BB_M39  | hypothetical protein | 8.08  | 3.00E-06 | Unknown |       |
| BB_K49  | hypothetical protein | 8.69  | 0        | Unknown | 4.15  |
| BB_G12  | hypothetical protein | 9.62  | 1.00E-06 | Unknown |       |
| BB_O16  | hypothetical protein | 9.81  | 3.30E-05 | Unknown |       |
| BB_F22  | hypothetical protein | 10.91 | 0        | Unknown |       |
| BB_R22  | hypothetical protein | 11.61 | 3.00E-06 | Unknown |       |
| BB_N42  | hypothetical protein | 12.8  | 0        | Unknown |       |
| BB_Q18  | hypothetical protein | 13.78 | 5.50E-05 | Unknown |       |
| BB_O42  | hypothetical protein | 16.24 | 0.00089  | Unknown |       |
| BB_0049 | hypothetical protein | 19.08 | 0        | Unknown |       |
| BB_J38  | hypothetical protein | 23.36 | 0        | Unknown | 3.06  |
| BB_0162 | hypothetical protein | 25.25 | 0        | Unknown | 4.26  |
| BB_C08  | hypothetical protein | 28.87 | 0.004078 | Unknown |       |
| BB_S32  | hypothetical protein | 43.27 | 0        | Unknown |       |

**Table S4 Genes differentially regulated by the DksA-deficient strain in response to starvation condition.**

| ID      | Symbol      | Description                                    | Relative expression<br>RPMI /<br>BSKII | FDR<br>adjusted P-<br>value | Category                |
|---------|-------------|------------------------------------------------|----------------------------------------|-----------------------------|-------------------------|
| BB_D21  |             | Plasmid partitioning protein                   | 2.12                                   | 7.90E-05                    | Cell Division           |
| BB_Q06  |             | membrane protein                               | 4.34                                   | 0.007243                    | Cell Envelope           |
| BB_J09  | <i>ospD</i> | outer surface protein D                        | 3.39                                   | 7.30E-05                    | Cell Envelope           |
| BB_H41  |             | membrane protein                               | 3                                      | 0.027645                    | Cell Envelope           |
| BB_0034 |             | outer membrane protein P13                     | 2.95                                   | 7.30E-05                    | Cell Envelope           |
| BB_H06  | <i>cspZ</i> | complement regulator-acquiring surface protein | 2.84                                   | 0.018053                    | Cell Envelope           |
| BB_B19  | <i>ospC</i> | outer surface protein C                        | 2.82                                   | 0.000143                    | Cell Envelope           |
| BB_M27  | <i>revA</i> | fibronectin binding protein                    | 2.45                                   | 0.027645                    | Cell Envelope           |
| BB_A24  | <i>dbpA</i> | decorin-binding protein A                      | 2.26                                   | 0.041396                    | Cell Envelope           |
| BB_A36  |             | lipoprotein                                    | 2.24                                   | 0.000304                    | Cell Envelope           |
| BB_K01  |             | lipoprotein                                    | 2.17                                   | 0.006755                    | Cell Envelope           |
| BB_J36  |             | lipoprotein                                    | 2.02                                   | 0.000143                    | Cell Envelope           |
| BB_0716 | <i>mreC</i> | rod shape-determining protein                  | -2.15                                  | 0.004589                    | Cell Envelope           |
| BB_0234 |             | integral membrane protein                      | -2.34                                  | 0.015231                    | Cell Envelope           |
| BB_0574 |             | integral membrane protein                      | -4.03                                  | 0.037345                    | Cell Envelope           |
| BB_0147 | <i>flaB</i> | flagellar filament core protein                | 2.55                                   | 0.000478                    | Chemotaxis and motility |
| BB_0570 | <i>cheY</i> | chemotaxis protein CheY                        | 2.05                                   | 0.005487                    | Chemotaxis and motility |
| BB_0276 | <i>fliZ</i> | flagellar biosynthesis protein                 | -2.97                                  | 0.022595                    | Chemotaxis and motility |
| BB_0057 | <i>gap</i>  | glyceraldehyde 3-phosphate dehydrogenase       | 2.2                                    | 0.00343                     | Metabolism              |
| BB_0630 | <i>pfkB</i> | 1-phosphofructokinase                          | 2.13                                   | 0.003473                    | Metabolism              |
| BB_0092 | <i>atpD</i> | V-type ATPase subunit D                        | -3.25                                  | 7.80E-05                    | Metabolism              |
| BB_F32  |             | pseudogene                                     | 2.86                                   | 1.00E-05                    | Pseudogene              |
| BB_Q57  |             | pseudogene                                     | 2.05                                   | 0.032989                    | Pseudogene              |
| BB_J15  |             | pseudogene                                     | -2.83                                  | 0.023975                    | Pseudogene              |
| BB_0741 | <i>groS</i> | chaperonin GroS                                | 2.06                                   | 0.004867                    | Stress Response         |
| BB_0697 | <i>rimM</i> | 16S rRNA-processing protein                    | -2.03                                  | 0.002797                    | Translation             |
| BB_0487 | <i>rpsQ</i> | 30S ribosomal protein S17                      | -2.06                                  | 0.041396                    | Translation             |
| BB_0469 | <i>lspA</i> | lipoprotein signal peptidase                   | -2.19                                  | 0.002797                    | Translation             |

|         |             |                                                       |       |          |                      |
|---------|-------------|-------------------------------------------------------|-------|----------|----------------------|
| BB_B04  | <i>chcB</i> | chitobiose transporter protein                        | 2.24  | 0.00323  | Transporter Proteins |
| BB_0448 | <i>hpr</i>  | phosphocarrier protein                                | -2.07 | 0.010755 | Transporter Proteins |
| BB_0318 |             | methylgalactoside ABC transporter ATP-binding protein | -2.15 | 0.003187 | Transporter Proteins |
| BB_0640 | <i>potC</i> | spermidine/putrescine ABC transporter permease        | -2.45 | 0.014362 | Transporter Proteins |
| BB_S32  |             | hypothetical protein                                  | 3.56  | 0.003473 | Unknown              |
| BB_0541 |             | hypothetical protein                                  | 2.27  | 0.023975 | Unknown              |
| BB_0049 |             | hypothetical protein                                  | 2.2   | 0.009009 | Unknown              |
| BB_0162 |             | hypothetical protein                                  | 2.07  | 0.002797 | Unknown              |
| BB_0752 |             | hypothetical protein                                  | -2.01 | 0.017376 | Unknown              |
| BB_0818 |             | hypothetical protein                                  | -2.06 | 0.028409 | Unknown              |
| BB_A54  |             | hypothetical protein                                  | -2.07 | 0.039268 | Unknown              |
| BB_0174 |             | hypothetical protein                                  | -2.14 | 0.041396 | Unknown              |
| BB_0790 |             | hypothetical protein                                  | -2.15 | 0.015231 | Unknown              |
| BB_0345 |             | hypothetical protein                                  | -2.37 | 0.000179 | Unknown              |
| BB_0139 |             | hypothetical protein                                  | -2.41 | 0.000312 | Unknown              |
| BB_G24  |             | hypothetical protein                                  | -2.6  | 0.006602 | Unknown              |
| BB_A13  |             | hypothetical protein                                  | -2.98 | 0.004566 | Unknown              |
| BB_0538 |             | hypothetical protein                                  | -3.25 | 0.000179 | Unknown              |
| BB_0851 |             | hypothetical protein                                  | -8.85 | 0.034811 | Unknown              |

**Table S5.** Bacterial strains, plasmids, and oligonucleotides used in this study.

| Bacterial strain                                        | Missing plasmids                                                                      | Source                   |
|---------------------------------------------------------|---------------------------------------------------------------------------------------|--------------------------|
| <i>B. burgdorferi</i><br>B31-A3                         | lp-5,                                                                                 | (Elias et al.,<br>2002)  |
| <i>B. burgdorferi</i><br>B31-A3 $\Delta dksA$           | lp-5, 21, 25, 28-4                                                                    | This study               |
| <i>B. burgdorferi</i><br>B31-A3 $\Delta relBbu$         | lp-5, 21, 25, 28-4                                                                    | This study               |
| <i>B. burgdorferi</i><br>B31-A3<br>$\Delta dksA::pDksA$ | lp-5, 21, 25, 28-4                                                                    | This study               |
| <i>B. burgdorferi</i> 297                               | cp32- 6                                                                               | (Hughes et al.,<br>1992) |
| <i>B. burgdorferi</i> 297<br>$\Delta dksA$              | cp32- 6                                                                               | This study               |
| <i>B. burgdorferi</i> 297<br>$\Delta dksA::pDksA$       | lp28-1, 28-5, 38, cp32- 6                                                             | This study               |
| Plasmid                                                 | Purpose                                                                               | Source                   |
| pCm:: $\Delta dksA$ - <i>aadA</i>                       | Deletion of <i>dksA</i> by homologous recombination in <i>B. burgdorferi</i> B31-A3   | This study               |
| pJSB636A                                                | Deletion of <i>dksA</i> by homologous recombination in <i>B. burgdorferi</i> 297      | This study               |
| pCm:: $\Delta relBbu$ - <i>aadA</i>                     | Deletion of <i>relBbu</i> by homologous recombination in <i>B. burgdorferi</i> B31-A3 | This study               |
| pKFSS-1                                                 | <i>B. burgdorferi</i> plasmid vector, confers streptomycin resistance                 | (Frank et al.,<br>2003)  |
| pBSV2G                                                  | <i>B. burgdorferi</i> plasmid vector, confers gentamicin resistance                   | (Elias et al.,<br>2003)  |
| pKFSS-1:: <i>dksA</i> -<br>FLAG (pDksA)                 | Confer streptomycin resistance and expression of <i>dksA</i>                          | This study               |
| pBSV2G:: <i>dksA</i> -<br>FLAG (pDksA)                  | Confer gentamicin resistance and expression of <i>dksA</i>                            | This study               |
| Primers                                                 | Sequence (5' to 3')                                                                   | Application              |
| <i>bb0332</i> RT F                                      | ACCTCTGGATGGATTACAGAAAG                                                               | RT-qPCR                  |
| <i>bb0332</i> RT R                                      | CTACGTTGGGCATGCTAAGA                                                                  | RT-qPCR                  |
| <i>dksA</i> RT F                                        | AATCTTGAAGCGTTAGGTTTTGTT                                                              | RT-qPCR                  |
| <i>dksA</i> RT R                                        | AAAGCATAAGGAATAGCTAAAAGTCTC                                                           | RT-qPCR                  |
| <i>flaB</i> RT F                                        | AGCTCCCTCACCAGAGAAA                                                                   | RT-qPCR                  |
| <i>flaB</i> RT R                                        | GCATCACTTTCAGGGTCTCA                                                                  | RT-qPCR                  |

|                    |                                                   |             |
|--------------------|---------------------------------------------------|-------------|
| <i>fliZ</i> RT F   | GTCGGAAGAAGAGCTGGA                                | RT-qPCR     |
| <i>fliZ</i> RT R   | CCTCAAGTTTAACATAATCATTCCC                         | RT-qPCR     |
| <i>relBbu</i> RT F | GGAGCAAACAAAGAGCAAAG                              | RT-qPCR     |
| <i>relBbu</i> RT R | CATTGTGCACTATTATTTTCGTCTT                         | RT-qPCR     |
| <i>rplL</i> RT F   | TTCAGTAGGTTTCGGCTGATTC                            | RT-qPCR     |
| <i>rplL</i> RT R   | CTCCAAGACCAAGTCCTGTAAT                            | RT-qPCR     |
| <i>rpoD</i> RT F   | TCTGATCAAGCTCGCACAAT                              | RT-qPCR     |
| <i>rpoD</i> RT R   | ATCCAAGCCTGTCTGAAAGC                              | RT-qPCR     |
| <i>ptsP</i> RT F   | CTTTCGGGCACTTAGGATGTAT                            | RT-qPCR     |
| <i>ptsP</i> RT R   | GCATAGGAACCATTACCCTTATCT                          | RT-qPCR     |
| <i>glpF</i> RT F   | AAGTCCCAGAAATACCAGGAG                             | RT-qPCR     |
| <i>glpF</i> RT R   | TTCTTGCTGCTGTGTAAATACC                            | RT-qPCR     |
| <i>glpK</i> RT F   | TTATCTATTGATCAAGGTACTACTAGCTCG                    | RT-qPCR     |
| <i>glpK</i> RT R   | CCTGTATTTTTTTTCCCATATAACCG                        | RT-qPCR     |
| <i>bba66</i> RT F  | CTGCTTCTGGTGTGTTAGAGTT                            | RT-qPCR     |
| <i>bba66</i> RT R  | GCTAGATGTTATTTCAAGTGCTAAAG                        | RT-qPCR     |
| <i>ospC</i> RT F   | CAGGGAAAGATGCGAATACATCTGC                         | RT-qPCR     |
| <i>ospC</i> RT R   | TAAGCTAAAGCTAACAATGATCC                           | RT-qPCR     |
| <i>dbpA</i> RT F   | GCTGCTCTTAAGGGCGTAAA                              | RT-qPCR     |
| <i>dbpA</i> RT R   | TAGCTCGCACTTTTGCTTCA                              | RT-qPCR     |
| <i>mlpI</i> RT F   | ACTGGTGCTGGAGAATTTGAT                             | RT-qPCR     |
| <i>mlpI</i> RT R   | CCTTAACCACCTCTTTGAAGGT                            | RT-qPCR     |
| TB-bb0168-F1-5'    | ACTGCT <b>GGATCC</b> CAGTTATGGACTTCAAGGCTG        | Mutagenesis |
| TB-bb0168-F1-3'    | AACAGCTTTTTGCAT <b>GAATTC</b> TCCCTATAAATTACA     | Mutagenesis |
| TB-bb0168-F2-5'    | GAAAAAAGAACA <b>ATCGAT</b> ACATCTTAAGTTA<br>GTTA  | Mutagenesis |
| TB-bb0168-F2-3'    | ACTGCT <b>CTCGAGA</b> ACCAACATTTTAAAATGATTGG      | Mutagenesis |
| aadA-5'-EcoR1      | ACTGCT <b>GAATTC</b> TACCCGAGCTTCAAGGAA           | Mutagenesis |
| aadA-3'-ClaI       | ACTGCT <b>ATCGATT</b> ATTTGCCGACTACCTTG           | Mutagenesis |
| AG-bb0168-F1-5'    | CAGCGTAAATAAGCAAGGAGAATATACAATAGGAG<br>C          | Mutagenesis |
| AG-bb0168-F1-3'    | <b>GGCGCGCC</b> GGCTTGTGAAAGAGAGATTGCTAGGG<br>AG  | Mutagenesis |
| AG-bb0168-F2-5'    | <b>GGCGCGCCT</b> CTTCAATAAACTCATGCTCAGAAACA<br>GC | Mutagenesis |
| AG-bb0168-F2-3'    | <b>GCGCGC</b> GATGCTGCACTTATCAAGATAGATAACAT<br>TC | Mutagenesis |

|                          |                                                                                             |                            |
|--------------------------|---------------------------------------------------------------------------------------------|----------------------------|
| <i>flgBp-aphI-T7t 5'</i> | <u>GGCGCGCCTAATACCCGAGCTTCAAGGAAG</u>                                                       | Mutagenesis                |
| <i>flgBp-aphI-T7t 3'</i> | <u>GGCGCGCCAGATCCGGATATAGTTCCTCCTTTC</u>                                                    | Mutagenesis                |
| <i>dksA</i> KpnI F       | ACTGTAG <u>GGTACCT</u> TACAATTCCTTCAGTTTCAATAGC<br>TTC                                      | pDksA plasmid construction |
| <i>dksA</i> FLG XhoI R   | ACTGCT <u>CTCGAG</u> TTATTTATCTGTCGTCATCGTCTT<br>TGT<br>AGTCTCTTTTGTTCCTTTTTTTCTTTTTTTGTCTG | pDksA plasmid construction |
| P1                       | GCGGGATCCGGATTCTTTTACAATTCC                                                                 | Mutant Confirmation        |
| P2                       | AAAGCATAAGGAATAGCTAAAAGTCTC                                                                 | Mutant Confirmation        |
| P3                       | ACTGCTGAATTCTACCCGAGCTTCAAG                                                                 | Mutant Confirmation        |
| P4                       | ACTGCTGAATTCTATTTGCCGACTACC                                                                 | Mutant Confirmation        |
| <i>aacCI</i> F           | GCGGCTAGCTAGGTAATACCCGAGCTT                                                                 | Mutant Confirmation        |
| <i>aacCI</i> R           | CGCCTGCAGTTAGGTGGCGGTACTTGGG                                                                | Mutant Confirmation        |
| <i>dksA</i> flanking F   | TTAAAAATGTAATTTATAGGGAGG                                                                    | Mutant Confirmation        |
| <i>dksA</i> flanking R   | TCCTAAGTCCTCCCC                                                                             | Mutant Confirmation        |
| <i>aadA</i> F            | ACTGCTGAATTCTACCCGAGCTTCAAG                                                                 | Mutant Confirmation        |
| <i>aadA</i> R            | ACTGCTGAATTCTATTTGCCGACTACC                                                                 | Mutant Confirmation        |
| <i>kan</i> F             | ATGAGCCATATTCAACGGG                                                                         | Mutant Confirmation        |
| <i>kan</i> R             | TTAGAAAACTCATCGAGCATCAAATG                                                                  | Mutant Confirmation        |
| <i>relBbu</i> flanking F | GAGCAAGGGCGCTGATATTGGGG                                                                     | Mutant Confirmation        |
| <i>relBbu</i> flanking R | GTGGGGCCTGTTGAGCTAAGC                                                                       | Mutant Confirmation        |
